# Supplementary material
Source: Copernicus journal article supplement (doi:10.5194/egusphere-2026-2849)
Supplement: Supplementary file 1 [file egusphere-2026-2849-supplement.pdf]

**SUPPLEMENTARY MATERIAL**

**Distribution of S<sub>1</sub> by Land Use**

Violin + Boxplot + Jitter points  
Red line = Median, White point = Mean

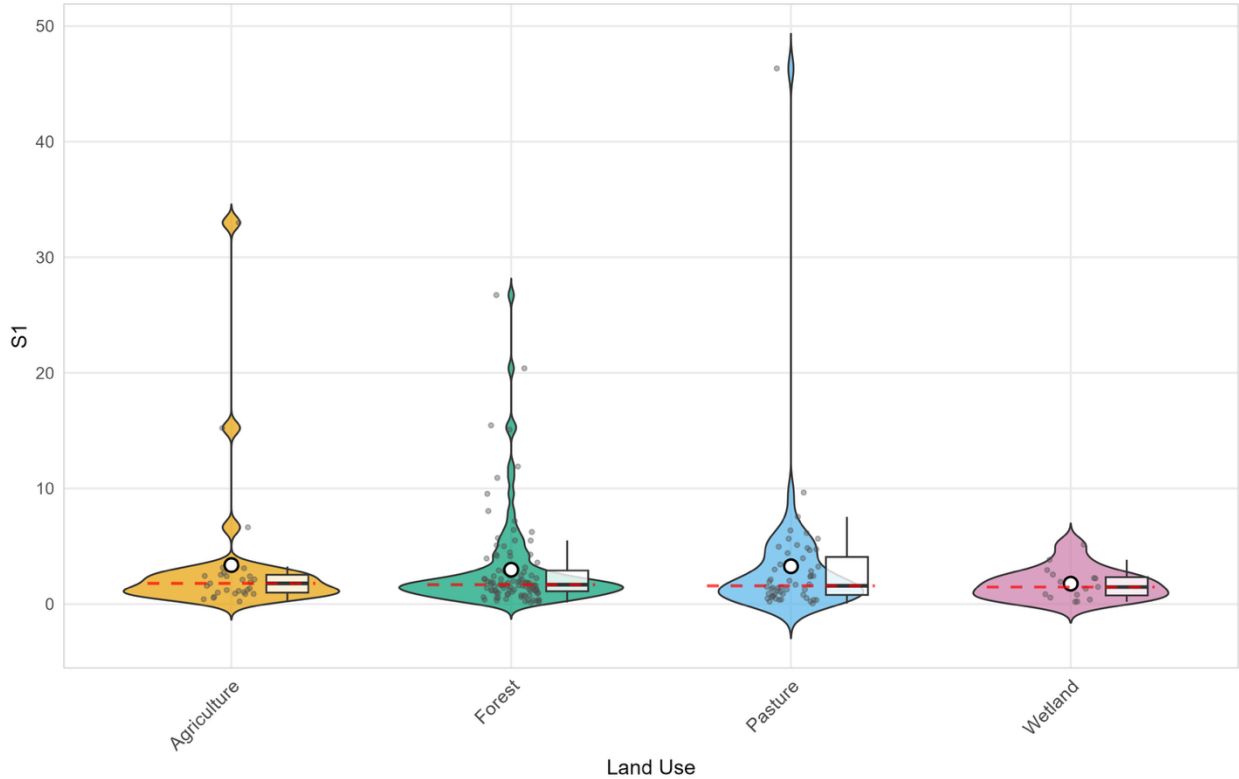

**Figure S1.** Violin plot of S<sub>1</sub> distribution by land use

### Distribution of S<sub>2</sub> by Land Use

Violin + Boxplot + Jitter points  
Red line = Median, White point = Mean

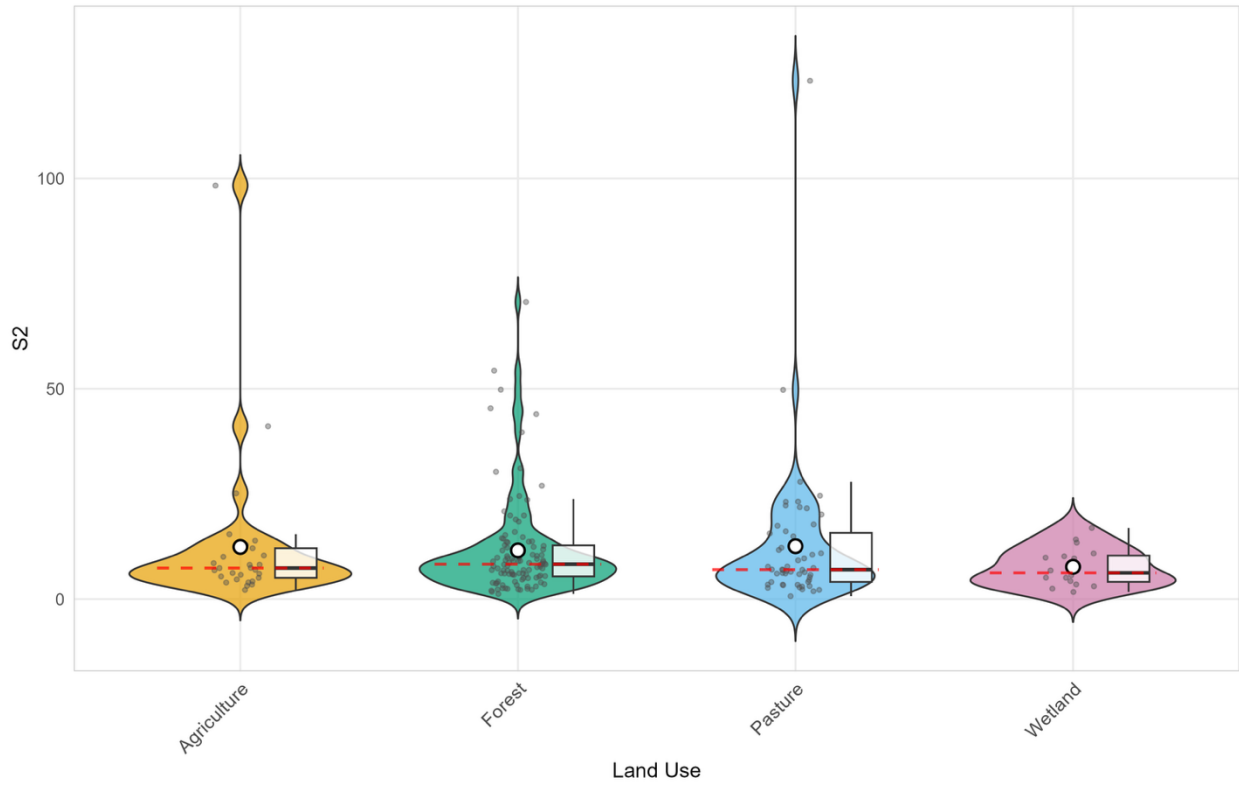

**Figure S2.** Violin plot of S<sub>2</sub> distribution by land use

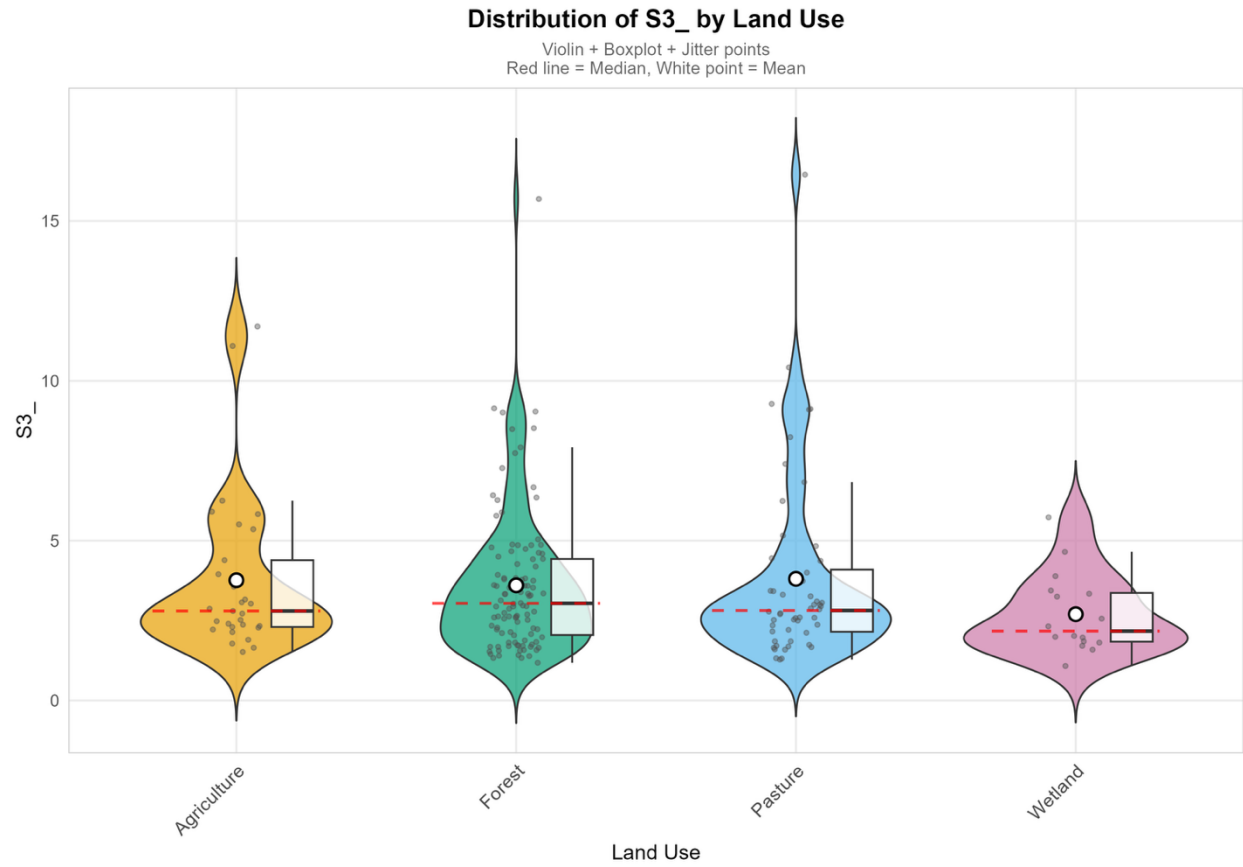

**Figure S3.** Violin plot of S<sub>3</sub> distribution by land use

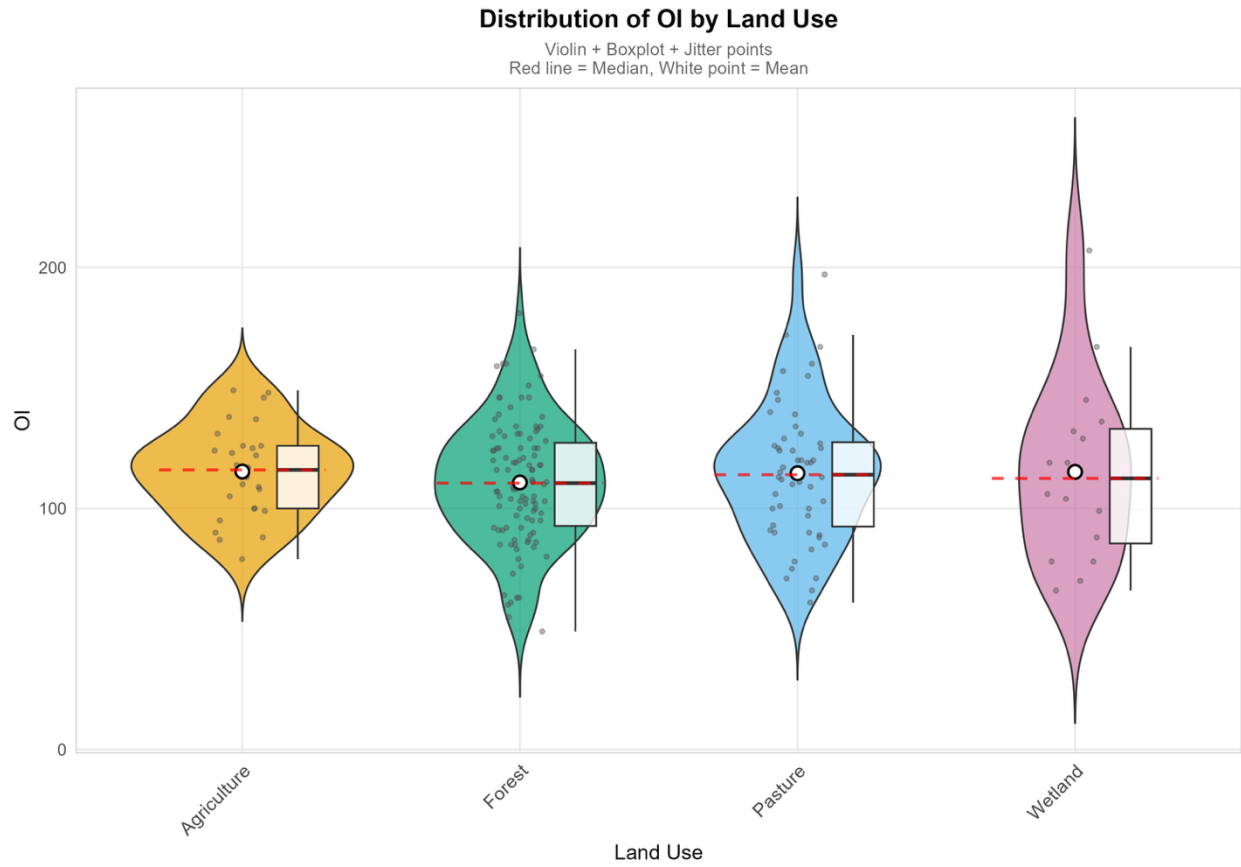

**Figure S4.** Violin plot of OI distribution by land use

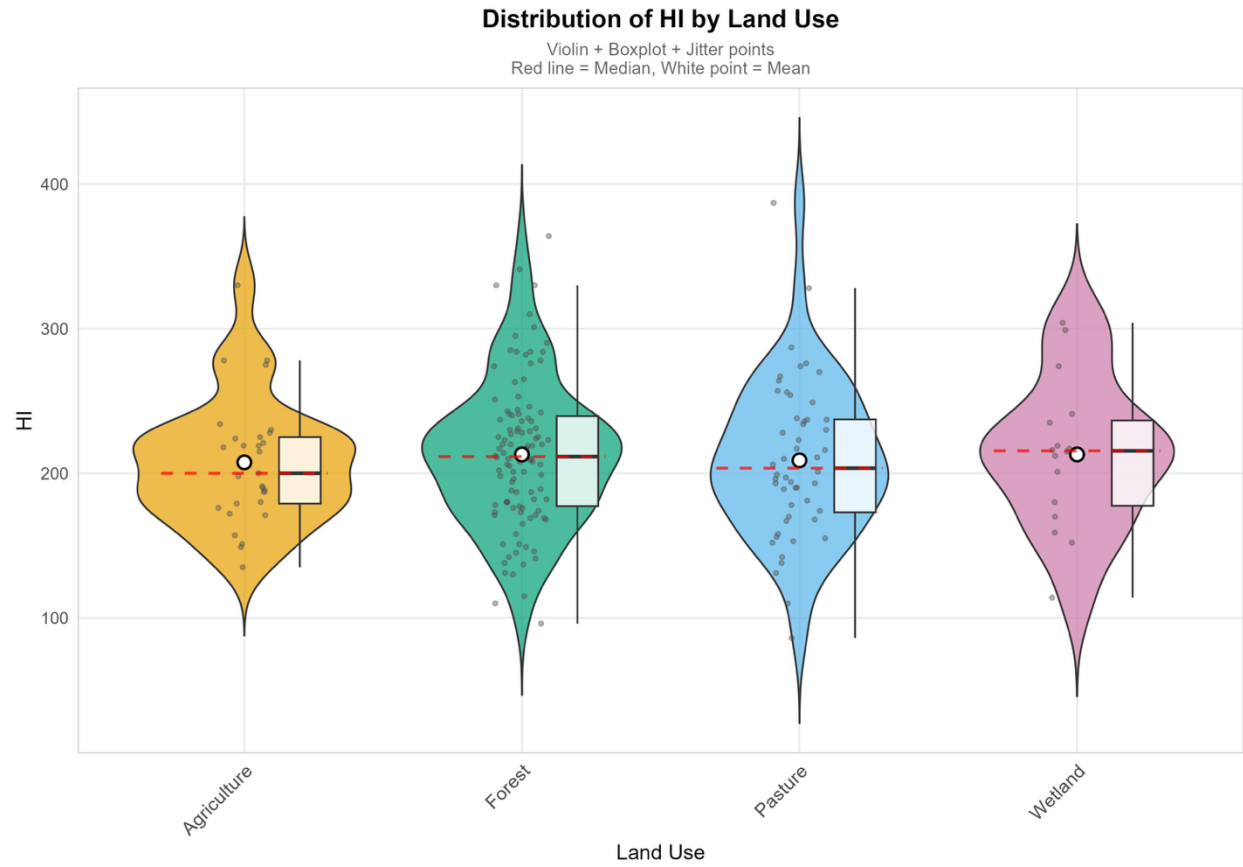

**Figure S5.** Violin plot of HI distribution by land use

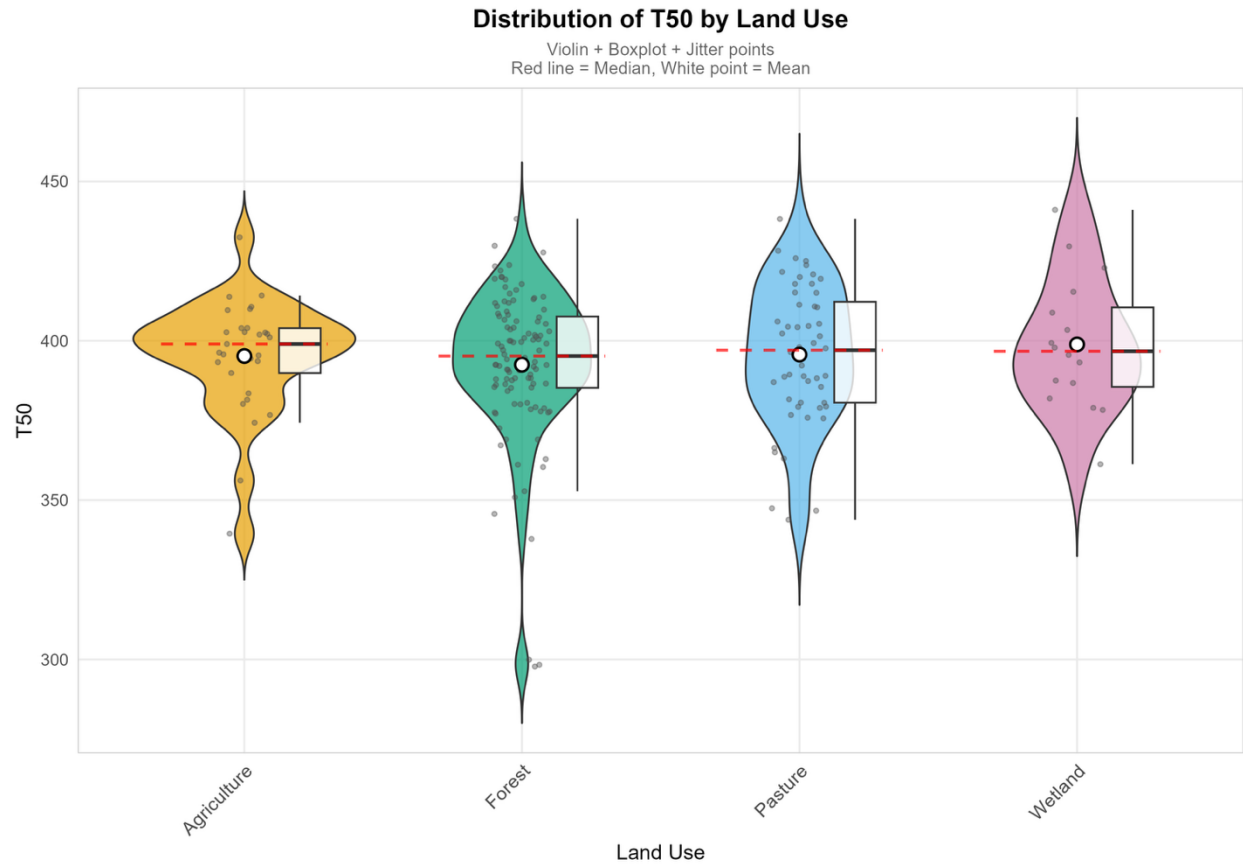

**Figure S6.** Violin plot of T<sub>50</sub> distribution by land use
