# Supplementary material
Source: Copernicus journal article supplement (doi:10.5194/egusphere-2026-2849)
Supplement: Supplementary file [file egusphere-2026-2849-RC1-supplement.pdf]

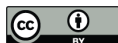

1 **Modelling and Interpreting Thermal Stability Indices to Understand Soil Carbon Stabilization**  
2 **Using Soil Properties Data**

3

4 **Kingsley John<sup>\*1</sup>, Travis Pennell<sup>1,2</sup>, Louis-Pierre Comeau<sup>2</sup>, Derek H. Lynch<sup>1</sup>, Moazame Mesgar<sup>3</sup>,**  
5 **Adam W Gillespie<sup>3</sup>, Brandon Heung<sup>1</sup>**

6

7 <sup>1</sup>Department of Plant, Food, and Environmental Science, Dalhousie University, Truro, NS,  
8 Canada

9

10 <sup>2</sup>Fredericton Research and Development Center, Agriculture and Agri-Food Canada, Fredericton, NB,  
11 Canada

12

13 <sup>3</sup>School of Environmental Sciences, University of Guelph, Guelph, Ontario, Canada

14

15 \*Corresponding Author: **Kingsley John<sup>\*1</sup>**(john.kingsley@dal.ca)

16



17 **ABSTRACT**

18 Soil organic carbon (SOC) sequestration and nutrient cycling are related to the susceptibility of soil  
19 organic matter to biological decomposition. Several studies have demonstrated associations between  
20 biological stability and thermal stability, as assessed using programmed pyrolysis. We sought to develop  
21 parsimonious machine learning (ML) models to predict SOC stability indices from measured soil  
22 properties. The study analyzed indices such as  $S_1$ ,  $S_2$ , and  $S_3$ ; the oxygen index (OI); the hydrogen index (HI);  
23 and  $T_{50}$ , which reflect SOC composition, thermal behaviour, and stability. A total of 203 soil samples  
24 collected at 0–15cm depth increments from agricultural, forest, and wetland landscapes in New  
25 Brunswick, Canada, were analyzed. Feature selection techniques optimized predictive models, and a  
26 random forest (RF) was used to develop one. Correlation results revealed that HI was  
27 negatively associated with pH ( $r = -0.35$ ) and bulk density ( $r = -0.33$ ), whereas OI showed a  
28 positive correlation with pH ( $r = 0.34$ ). Thermal indices were more strongly related to soil chemistry and  
29 texture, with  $S_1$  closely correlated with total carbon ( $r = 0.88$ ) and nitrogen, and  $S_2$  negatively associated  
30 with sand ( $r = -0.66$ ) but positively associated with clay ( $r = 0.24$ ) and POXC ( $r = 0.84$ ).  $T_{50}$  showed  
31 positive correlations with both pH ( $r = 0.48$ ) and bulk density ( $r = 0.36$ ), indicating greater thermal  
32 stability in higher-pH, compacted soils, though these patterns varied by land use. Random Forest (RF)  
33 model predicted  $S_1$ - $S_3$  indices with high accuracy (CCC = 0.83–0.86), while HI and OI were more  
34 difficult to model (CCC = 0.44–0.48), suggesting missing biological or environmental predictors;  $NH_4^+$   
35 and POXC emerged as key predictors. Structural equation modeling (SEM), after addressing  
36 multicollinearity, supported a hypothesis-driven model that explained ~54% of  $T_{50}$  variation. Clay  
37 dissolved organic carbon, pH, and aluminum showed significant direct associations with  $T_{50}$  ( $\beta$  for pH =  
38 0.44), whereas bulk density showed no meaningful relationship. Our study demonstrates that ML and  
39 SEM can reveal patterns and associations between soil properties and thermal stability indices, offering  
40 insight into understanding the SOC stability under a changing climate as well as presenting a framework  
41 for rapid estimation of SOC stability proxies.

42  
43 **Keywords:** Carbon Stabilization; Machine Learning; Geochemical Indicators; Thermal Stability;  
44 Rock-Eval Pyrolysis; Structural Equation Model

45  
46  
47

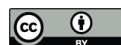

## 48 1. INTRODUCTION

49 Understanding soil organic carbon (SOC) stability is essential for maintaining the global nutrient cycle  
50 and advancing climate-smart agricultural practices (Barreto et al., 2021). SOC stability is referred to as  
51 the capacity of organic matter to resist microbial decomposition (Gregorich et al., 2015) and directly  
52 influences nutrient cycling, greenhouse gas emissions, and carbon sequestration. The decomposability  
53 of SOC, measured as the mineralized carbon per unit of total SOC, is influenced by environmental  
54 factors, soil type, microbial activity, and interactions between organic matter and soil minerals  
55 (Gregorich et al., 2015).

56 Thermal analysis is a widely used method for assessing SOC stability, involving controlled  
57 heating of soil samples to measure mass loss and energy exchange associated with decomposition of  
58 organic bonds and organo-mineral associations (Gillespie et al., 2014; Peltre et al., 2013; Plante et al.,  
59 2009). Programmed pyrolysis (PP), as implemented in Rock-Eval or HAWK analyzers (Wildcat  
60 Technologies, Humble, Texas, USA), operates by heating whole soil under an inert atmosphere,  
61 generating diagnostic indices including  $S_1$  (volatile hydrocarbons),  $S_2$  (hydrocarbons from thermal  
62 cracking of non-volatile OM),  $S_3$  ( $CO_2$  from oxygen-containing functional groups), and the derived  
63 hydrogen index ( $HI = S_2/TOC$ ) and oxygen index ( $OI = S_3/TOC$ ) are commonly used Rock-Eval-derived  
64 indicators of organic matter composition (Gillespie et al., 2014; Mesgar et al., 2024b; Plante et al., 2009).  
65 Additional thermal stability metrics include  $T_{50}$ , the temperature at which 50% of SOC is volatilized  
66 (Cécillon et al., 2018; Delahaie et al., 2023). Other thermal analytical approaches, such as  
67 thermogravimetry (TG), differential scanning calorimetry (DSC; Gill et al., 2010; McElhaney, 1982),  
68 and evolved gas analysis (EGA; Fernández et al., 2011; Risoluti et al., 2022; Verchovsky et al., 2020;  
69 Barros et al., 2011; Lorenz et al., 2024), provide complementary information on mass-loss patterns,  
70 energy fluxes, and evolved gas composition. Pyrolysis–gas chromatography/mass spectrometry  
71 (Py-GC/MS) further enables molecular-level characterization of organic compounds (Fernández et al.,  
72 2012; Rombolà et al., 2016). Although these techniques operate on different principles and platforms,  
73 integrating their outputs can provide a more complete assessment of SOC composition and persistence  
74 (Doležalová-Weissmannová et al., 2023; Gao et al., 2015; Kučerík et al., 2013; Plante et al., 2009).

75 Previous studies demonstrated that SOC thermal stability was correlated with biological stability,  
76 supporting the deployment of thermal analysis as a proxy for decomposability (Gregorich et al., 2015;  
77 Peltre et al., 2013). Furthermore, recent studies have linked thermal stability indices to landscape  
78 position, management practices, and soil properties; for example, Shi et al. (2024) showed that SOC

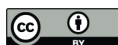

79 thermal stability was higher in depositional landscapes, in comparison to eroded ones, due to the  
80 increased clay and silt contents, cation exchange capacity (CEC), and specific surface area. An et al.  
81 (2023) found higher thermal stability in hedgerow croplands than adjacent forested areas, suggesting  
82 management-induced changes in organo-mineral associations. In permafrost regions, Fang et al. (2021)  
83 observed that drier conditions promoted stronger SOC stability via enhanced mineral-organic  
84 associations. Collectively, these studies indicate that soil physicochemical properties, specifically  
85 texture, mineralogy, and nutrients, are closely linked to the thermal behaviour of SOC.

86 Despite these advances, no studies have sought to systematically understand the relationships  
87 between routinely measured soil properties and thermal stability indices. Traditional methods for  
88 assessing SOC stability (e.g., PP, Py-GC/MS, NMR) remain labour-intensive and costly, limiting their  
89 application in large-scale monitoring. Pedotransfer functions (PTFs), predictive models estimating hard-  
90 to-measure properties from readily available data, offer a potential solution. Originally developed for  
91 soil physical properties (Bouma, 1989), PTFs have been extended using machine learning (ML)  
92 algorithms such as Random Forest, Cubist, and support vector regression to capture nonlinear  
93 relationships between soil properties (Arbor et al., 2023, 2024; Laurence et al., 2023; Padarian et al.,  
94 2020; Van Looy et al., 2017). Although PTFs are typically used for predictive purposes, their structure  
95 also provides insight into the soil relationships themselves. For example, interpretable ML frameworks,  
96 incorporating feature selection (e.g., recursive feature elimination) and *post-hoc* analyses (e.g., variable  
97 importance, partial dependence plots) have been advocated to both predict and understand soil-  
98 environment relationships (Kasraei et al., 2024; Laurence et al., 2024; Paul et al., 2023; Wadoux &  
99 Molnar, 2022). These approaches are highly applicable to developing PTFs for SOC thermal stability  
100 while simultaneously elucidating the underlying drivers.

101 Structural equation modeling (SEM) provides a complementary framework to machine learning  
102 by enabling explicit hypothesis testing of theory-derived pathways linking soil properties to thermal  
103 stability indices. Unlike black-box prediction algorithms, SEM allows the specification and evaluation  
104 of hypothesized relationships among variables, the distinction between direct and indirect associations,  
105 and the identification of potential mediation patterns (Grace et al., 2016; Shipley, 2016). This capability  
106 is particularly important for understanding how soil properties may interrelate in an integrated system;  
107 for example, whether clay content shows a direct association with  $T_{50}$ , or whether its relationship with  
108  $T_{50}$  is mediated through carbon quality and nutrient availability. Recent studies have demonstrated  
109 SEM's utility in revealing complex biogeochemical patterns, including the pathways by which land use

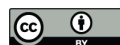

110 change relates to organic matter stability (Li et al., 2022) and how mineralogical controls correlate  
111 with carbon persistence across climatic gradients (Rasmussen et al., 2018). However, no study has  
112 systematically integrated SEM with interpretable machine learning to both predict thermal stability  
113 indices and explore their multivariate relationships with soil physicochemical properties.

114 Here, we employ a two-stage analytical framework: first, random forest modelling with recursive  
115 feature elimination to identify key predictors and quantify their importance; second, using SEM to test  
116 *a priori* hypotheses about causal pathways linking these predictors to  $T_{50}$ . This integrated approach goes  
117 beyond single-method studies by leveraging machine learning for predictive accuracy and SEM for  
118 mechanistic inference, thereby addressing both practical prediction needs and fundamental  
119 understanding of SOC stabilization processes.

120 We hypothesize that soil physical and chemical properties, as key controls on stabilization  
121 mechanisms such as organo-mineral association, aggregation, and organic matter chemistry, can serve  
122 as proxies for predicting SOC thermal stability indices. Specifically, we expect that soil properties  
123 associated with mineral reactivity (clay content, Fe/Al oxides), chemical characteristics (pH, CEC), and  
124 labile carbon pools (permanganate oxidizable carbon, dissolved organic carbon) will be significant  
125 predictors. Our objectives were as follows: (1) to develop parsimonious machine learning (ML) models  
126 to predict a suite of thermal stability indices ( $S_1$ ,  $S_2$ ,  $S_3$ , HI, OI, and  $T_{50}$ ) from routinely measured soil  
127 properties; (2) to identify the most influential predictors using feature selection and variable importance  
128 analysis; and (3) to explore causal pathways linking soil properties to thermal stability using SEM. By  
129 leveraging interpretable ML, this study aimed to advance mechanistic understanding of how soil  
130 properties inform SOC thermal stability patterns and provide a framework for rapid, low-cost estimation  
131 of HAWK pyrolysis thermal stability indices, which explain SOC stability.

## 132 2. MATERIALS & METHODS

### 133 2.1. Study Area

134 This research was conducted in the Province of New Brunswick, in the Atlantic Maritime Ecozone of  
135 Eastern Canada (Fig. 1). The province of 71,388 km<sup>2</sup> receives an annual average precipitation of 1100  
136 mm. Geomorphological features include mountainous regions in the North, lowlands and ocean coasts  
137 in the East, and the Saint John River in the South, flowing towards the Bay of Fundy (Pronk and  
138 Ruitenbergh, 1991). Geological deposits comprise mainly glacial till, glaciofluvial, glaciolacustrine, and  
139 glaciomarine deposits (Furze and Arp, 2020; Rampton, 1984). In addition, the area is characterized by  
140 outcrops and relatively shallow soils (< 25 cm) across an extended region of the province (Furze et al.,



141 2021). The soils of the region are predominantly Podzols, Gleysols, Cambisols, Luvisols, and Organics  
142 with variable degrees of drainage (Fahmy et al., 2010; IUSS Working Group WRB, 2007).

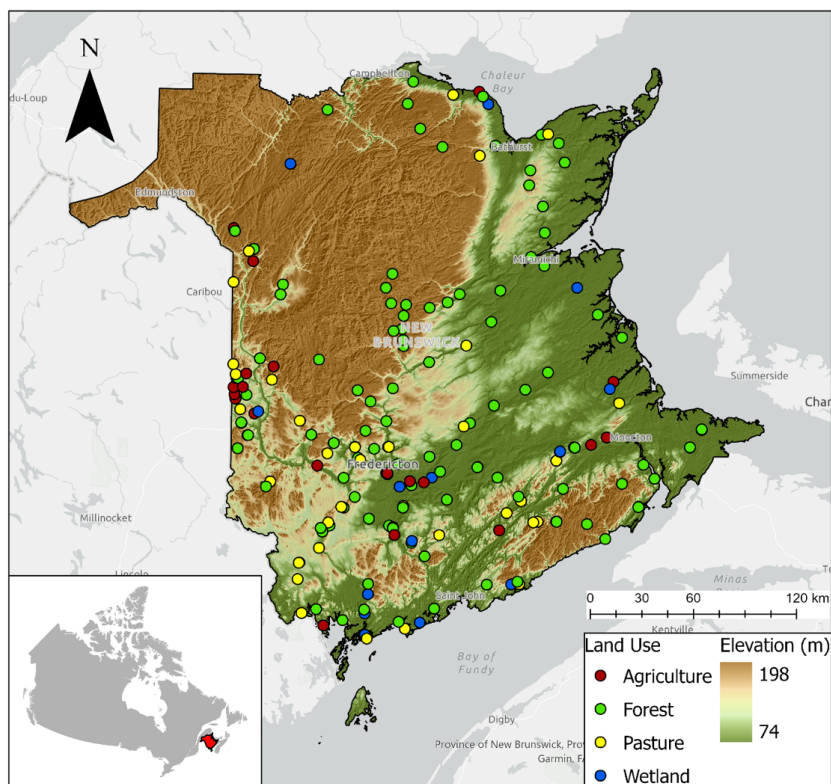

143 **Figure 1.** Map of the study area showing soil sampling locations across different land cover types.  
144  
145

## 146 2.2. Soil Data Acquisition

### 147 2.2.1. Soil Sampling Campaign

148 We collected  $n = 203$  soil samples at a depth of 0–15 cm via stratified random sampling throughout New  
149 Brunswick, representing various land cover types, including agricultural, forested, and wetland areas, as  
150 part of the Canadian Soil Biodiversity Observatory program  
151 (<https://sis.agr.gc.ca/cansis/biome/index.html>). Soil samples were transported to the laboratory, air-  
152 dried, sieved with a 2 mm sieve, and carefully prepared for analyzing soil properties and carrying out  
153 programmed pyrolysis.

154 The primary source of soil data was acquired through an ongoing Agriculture and Agrifood  
155 Canada sampling effort. The sampling strategies for this project were a combination of conditioned Latin



156 hypercube sampling (cLHS; Minasny and McBratney, 2006) and opportunistic sampling. For the cLHS  
157 approach, locations were restricted to selected areas that fell within a 200 m buffer of the road for ease  
158 of sampling. Opportunistic sampling locations were selected at the discretion of field technicians to  
159 supplement cLHS points, ensuring that each sampling point maintained a minimum distance of 10 km  
160 between points with a shared land cover classification.

### 161 2.2.2. Soil Physical and Chemical Properties

162 All laboratory analysis methods were determined using standard soil testing protocols as reported in  
163 Vallotton et al. (2025). These included sand, silt, clay (particle size fractions, %); BD (bulk density, g  
164  $\text{cm}^{-3}$ ) and BD\_FINE (bulk density corrected for coarse fragments,  $\text{g cm}^{-3}$ ); and Agg\_stab (aggregate  
165 stability, %) at 0 -15cm. Soil carbon and nitrogen pools comprised: TC (total carbon, %), TN (total  
166 nitrogen, %), and C:N (carbon-to-nitrogen ratio); POXC (permanganate oxidizable carbon,  $\text{mg kg}^{-1}$ ), a  
167 measure of labile carbon; DOC (dissolved organic carbon, ppm); TDN (total dissolved nitrogen, ppm);  
168 TON (total organic nitrogen, ppm); TIN (total inorganic nitrogen, ppm);  $\text{NH}_4^+$  (ammonium-nitrogen,  
169 ppm); and  $\text{NO}_3^-$  (nitrate-nitrogen, ppm). Soil chemical properties and nutrients included: pH (soil pH);  
170 CEC (cation exchange capacity,  $\text{meq } 100 \text{ g}^{-1}$ ); Base\_sat (base saturation, %);  $\text{P}_2\text{O}_5$  (phosphate, ppm);  
171  $\text{K}_2\text{O}$  (potash, ppm); and extractable nutrients B (boron), Cu (copper), Zn (zinc), S (sulfur), Mg  
172 (magnesium), Fe (iron), Ca (calcium), Mn (manganese), Al (aluminum), and Na (sodium), all in ppm.  
173 Exchangeable cation saturations were expressed as percentages: K\_sat (potassium saturation), Mg\_sat  
174 (magnesium saturation), Ca\_sat (calcium saturation), H\_sat (hydrogen saturation), and Na\_sat (sodium  
175 saturation).

### 176 2.2.3. Thermal Stability Indicators

177 SOC thermal stability was assessed using programmed pyrolysis (PP), as described by Mesgar  
178 et al. (2024). Analyses were performed using a HAWK pyrolysis instrument (Wildcat Technologies,  
179 Humble, Texas, USA) at the Geological Survey of Canada, Calgary. This approach is analogous to Rock-  
180 Eval© pyrolysis, involving two controlled heating stages under anaerobic (pyrolysis) and oxidative  
181 conditions.

182 In the initial pyrolysis phase, 70 mg of finely ground ( $< 250 \mu\text{m}$ ) soil was held isothermally under  
183  $\text{N}_2$  at 300 °C for 3 min. During this stage, the hydrocarbons (HC) released were detected using a Flame  
184 Ionization Detector (FID) and recorded as the  $\text{S}_1$  peak ( $\text{mg HC g}^{-1}$  of sample). Following the SI step, the  
185 temperature was increased at a rate of 20 °C  $\text{min}^{-1}$  to 650 °C to thermally decompose the more thermally

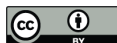

186 stable fraction of OM. The HC released in this phase was measured as the S<sub>2</sub> peak (mg HC g<sup>-1</sup> of sample),  
 187 also recorded via the FID. Together, S<sub>1</sub> and S<sub>2</sub> represent the organic C liberated during thermal  
 188 decomposition (Table 1). Concurrently, evolved gases, including carbon dioxide (CO<sub>2</sub>) and carbon  
 189 monoxide (CO), released during pyrolysis were monitored using an infrared (IR) detector and are  
 190 represented as S<sub>3</sub>' (mg CO g<sup>-1</sup> of sample; Baudin et al., 2015; Table 1).

191 From these measurements, several derived indices were calculated. The **Hydrogen Index** (HI, mg  
 192 HC/g TOC) and Oxygen Index (OI, mg O<sub>2</sub>/g TOC) are calculated by normalizing the S<sub>2</sub> and S<sub>3</sub> values,  
 193 respectively, to the TOC content of the sample. The HI reflects the hydrogen-rich, energy-dense portion  
 194 of SOC and is often used as a proxy for OM quality (Gillespie et al., 2014; Gregorich et al., 2015). The  
 195 OI characterizes the relative oxygen content in OM and its potential oxidizability. The T<sub>50</sub> is a thermal  
 196 stability index **denote** the temperature at which 50% of the total pyrolyzable organic matter is released.  
 197 T<sub>50</sub> captures the median decomposition temperature across the full temperature range (Barros et al.,  
 198 2011; Gregorich et al., 2015). Higher T<sub>50</sub> values indicate greater SOC thermal resistance and are typically  
 199 associated with mineral-associated organic matter or chemically recalcitrant compounds.

200 **Table 1.** HAWK Rock-Eval pyrolysis thermal indices

| Thermal Indices | Abbreviation | Definitions                                                             | Unit                                    |
|-----------------|--------------|-------------------------------------------------------------------------|-----------------------------------------|
| <b>S1</b>       | S1           | Hydrocarbon <sup>1</sup> released between 0 and 300 °C                  | HC-mg <sup>1</sup> / g-rock             |
| <b>S2</b>       | S2           | Hydrocarbon <sup>1</sup> produced between 200 and 650 °C                | HC-mg <sup>1</sup> / g-rock             |
| <b>OI</b>       | OI           | Equal to (S <sub>3</sub> /TOC <sup>2</sup> ) × 100                      | O <sub>2</sub> -mg / g TOC <sup>2</sup> |
| <b>HI</b>       | HI           | Equal to ((S <sub>1</sub> + S <sub>2</sub> ) / TOC <sup>2</sup> ) × 100 | HC-mg <sup>1</sup> / g TOC <sup>2</sup> |
| <b>S3'</b>      | S3           | Pyrolysis of OM <sup>3</sup>                                            | mg-CO <sub>2</sub> / g-rock             |
| <b>T50</b>      | T50          | Temperature at which 50% of the loss in SOM <sup>4</sup> weight occurs  | Celsius (°C)                            |

201 <sup>1</sup> HC = hydrocarbons; <sup>2</sup> TOC = total organic carbon; <sup>3</sup> OM = organic matter; <sup>4</sup>SOM = organic matter;

202

203



## 204 2.3. Predictive Modelling Framework

205 The predictive modelling framework follows the approach of Kasraei et al. (2024). It involves four key  
206 steps: (1) addressing multicollinearity among predictor variables **variance inflation factor (VIF) analysis**  
207 **(Section 2.3.1)**; (2) fitting a **Random Forest** (RF) model to predict each thermal stability index **(Section**  
208 **2.3.2)**; (3) applying recursive feature elimination (RFE) to ensure model parsimony by removing non-  
209 informative variables **(Section 2.3.3)**; and (4) conducting *post-hoc* model assessments, including  
210 structural equation modeling (SEM) and model interpretability techniques (Fig. 2; **Section 2.4**).

### 211 2.3.1. Addressing Multicollinearity

212 Multicollinearity among predictors was assessed and mitigated using the VIF, which quantifies the  
213 proportion of variance in each predictor that can be explained by all other predictors (Craney **& and**  
214 Surles, 2002). Here, VIF was calculated in equation (1):

$$215 \quad VIF_i = \frac{1}{1 - R_i^2} \quad (1)$$

216 where  $R_i^2$  is the coefficient of determination from fitting a linear regression between the *i*-th predictor  
217 and all other predictors. VIF can range from 1 to infinity, with a value of 1 indicating no  
218 multicollinearity, values between 1 and 5 suggesting a moderate collinearity, and values > 5 indicating  
219 a high degree of collinearity (Curto **& and** Pinto, 2011; Thompson et al., 2017). A stepwise approach  
220 was used to address multicollinearity by iteratively removing covariates with the highest VIF until all  
221 remaining covariates had a VIF of 5 or lower, **reducing the full set of covariates to 21 predictors**. The  
222 VIF analysis was implemented in R using the *oss.seqVIF* function in the *onsoilsurvey* package (Saurette,  
223 2021).

### 224 2.3.2. Random Forest

225 The RF model is an ensemble machine learning algorithm based on decision trees, which was used to  
226 model the relationship between soil physicochemical properties and thermal stability indices. For each  
227 tree-based model (i.e., base learner), the training data is split at nodes using the values of the predictor  
228 variables to maximize within-node similarity and between-node differences (Breiman et al., 1948). RF  
229 enhances this approach by constructing multiple trees, each trained on a randomized bootstrap sample  
230 (with replacement) of the dataset, creating a diverse ‘forest’ of decision trees. At each node, a random  
231 subset of predictors is selected for splitting. The final RF prediction is determined by aggregating the



232 outputs of all trees, using averaging for regression applications. Two key hyperparameters define the RF  
233 model:  $n_{tree}$ , which specifies the number of decision trees, and  $m_{try}$ , which sets the maximum number of  
234 covariates considered at each split (Breiman, 2001).

235 Model performance was assessed using Lin's concordance correlation coefficient (CCC),  
236 coefficient of determination ( $R^2$ ), root mean square error (RMSE), and bias. The best-performing model  
237 for each index was selected based on the highest CCC and lowest RMSE values. The models were tuned  
238 using a predefined grid of hyperparameters, spanning the range of  $m_{try}$  values, and using a 10-fold cross-  
239 validation procedure with 20 repeats.

#### 240 2.3.3. Recursive Feature Elimination

241 During the RF modelling process, the 21 uncorrelated variables identified through VIF were  
242 further reduced using RFE to identify the minimal set of variables that maintains model performance.  
243 RFE was implemented using the *caretFuncs* function within the *caret* R package, which evaluates the  
244 contribution of each predictor against the response variable (e.g., thermal stability indicators) based on  
245 variable importance scores. Less important features were progressively removed during the iteration.

246 Following this, the RFE output provided various features alongside their corresponding  
247 performance metrics. Features resulting in the lowest RMSE were selected for modeling (Kuhn, 2019).  
248 Additionally, the RMSE from repeated cross-validation runs was used to compute and plot the 90%  
249 confidence intervals (CI) for each RFE model. The model with the reduced set of covariates achieving  
250 the lowest RMSE was considered the baseline for comparison with other models. Here, the 'smallest'  
251 model, where removing an additional predictor would not significantly increase RMSE, was retained  
252 and subsequently used to build the models and SEM for thermal stability indices.

#### 253 2.4. Post-Hoc Model Assessment

254 Several *post-hoc* assessment tools, such as Shapley value, partial dependence plots (PDP), individual  
255 conditional expectation (ICE) plots, and accumulated local effects (ALE) plots, have been developed to  
256 address the challenge of interpreting ML prediction (Friedman, 2001; Goldstein et al., 2015; Apley and  
257 Zhu, 2020; Molnar et al., 2021). This need arises because many ML models are considered 'black box'  
258 models. Collectively, the methods help integrate physical knowledge into ML to improve interpretability  
259 and transparency.

260



261 2.4.1. *Variable Importance Analysis*

262 We used the *caret* package in R to generate permutation-based, model-agnostic measures of variable  
263 importance for predicting thermal indices using RF. This analysis is important as it allows the model to  
264 measure the contribution of each predictor (e.g., soil physical and chemical properties) to overall  
265 accuracy.

266 2.4.2. *Partial Dependence Plots & Individual Conditional Expectation Plots*

267 The PDPs show the interaction between the features and the prediction (Friedman, 2001). The PDP  
268 estimates the mean marginal effect of predictors on the predicted thermal indices, which can be  
269 determined value in regression. To plot these effects, the dataset was first split into two groups: the  
270 feature of interest and all other features. Following this, each value from this set was systematically  
271 substituted into the feature of interest across all observations. This created a synthetic data point where  
272 only the feature of interest varied, while all other features remained unchanged. Lastly, the trained RF  
273 learner then predicted the target variable (e.g., thermal index) for each synthetic observation. These  
274 predictions represented the marginal effect of the feature of interest.

275 Unlike PDPs, which show average effects, ICE plots display the relationship between a feature  
276 and the predicted response for each observation (Goldstein et al., 2015). Like PDP, ICE keeps all other  
277 features constant while systematically varying the feature of interest across a defined grid. For each  
278 observation, synthetic data points are created by replacing the original feature value with values from  
279 this grid. The model then predicts the response for each of these synthetic instances. Repeating this  
280 process for all observations allows ICE plots to reveal how each feature influences individual  
281 predictions, offering a more detailed and transparent view of model behavior.

282 2.4.3. *Structural Equation Modelling (SEM)*

283 We employed structural equation modeling (SEM) to test *a priori* hypotheses about theoretically derived  
284 relationships between soil properties and thermal stability of SOC (e.g.,  $T_{50}$ ), complementing predictive  
285 machine learning with path analysis that can reveal direct and indirect associations. Before the SEM  
286 specification, we addressed severe multicollinearity (Section 2.3.1). Following Wade et al. (2026) on the  
287 importance of justifiable *a priori* models, we formulated five hypotheses based on biogeochemical  
288 theory, predicting specific directional relationships: clay content would yield a positive association with  
289  $T_{50}$ , consistent with physical protection mechanisms (H<sub>1</sub>; Six et al., 2004); dissolved organic carbon



290 would yield a negative interaction with  $T_{50}$ , reflecting labile carbon pools (H<sub>2</sub>; Lehmann & Kleber,  
291 2015); soil pH would demonstrate a positive relationship with  $T_{50}$  through cation bridging effects (H<sub>3</sub>;  
292 Rowley et al., 2018); aluminum content would show a positive interaction with  $T_{50}$ , consistent with  
293 organo-mineral complex formation (H<sub>4</sub>; Kleber et al., 2007); and bulk density would show a  
294 positive interaction with  $T_{50}$  through physical structure effects (H<sub>5</sub>; Dungait et al., 2012).

295 Using the *lavaan* package (Rosseel, 2012) with standardized variables, we compared three  
296 models: the *a priori* hypothesis model (Model 1;  $T_{50}$  as a function of clay, dissolved carbon, pH,  
297 aluminum, and bulk density); an exploratory model incorporating additional variables (Model 2;  
298 permanganate oxidizable carbon, C:N, P<sub>2</sub>O<sub>5</sub>) that showed strong bivariate correlations ( $|r| > 0.30$ ) with  
299  $T_{50}$ ; and a mediation model testing indirect pathways of pH and clay via dissolved carbon and aluminum  
300 (Model 3). Models were fitted using maximum likelihood with robust standard errors and bootstrap  
301 resampling ( $n = 1000$ ) for mediation analysis (Preacher & Hayes, 2008). Model fit was assessed using  
302 the Akaike information criterion (AIC), Bayesian information criterion (BIC), comparative fit index  
303 (CFI  $\geq 0.90$ ), and root mean square error of approximation (RMSEA  $\leq 0.08$ ; Hu & Bentler, 1999; Shi et  
304 al., 2019). It is important to note that lower AIC values indicate better fit, but significance may depend  
305 on sample size; lower BIC values indicate better fit; RMSEA  $\leq 0.08$  or lower values (acceptable),  $\leq 0.05$   
306 (good fit); CFI  $\geq 0.90$  (acceptable),  $\geq 0.95$  (good fit) (Shi et al., 2019).

307 Model 1 was selected as the primary model based on theoretical grounding, parsimony, and  
308 comparable explanatory power to more complex alternatives. Standardized path coefficients ( $\beta$ ) were  
309 interpreted at  $\alpha = 0.05$ , with hypotheses considered supported if coefficients were statistically significant  
310 and directionally consistent with predictions. We further tested model robustness using 10-fold cross-  
311 validation repeated 20 times, with close agreement between calibration and validation ( $R^2$ ). We present  
312 path diagrams generated using *semPlot* (Epskamp et al., 2012) with color-coded edges indicating  
313 direction and significance of associations. We explicitly distinguish exploratory Model 2 results from  
314 confirmatory hypothesis tests, recognizing that all findings represent correlational evidence consistent  
315 with, but not proof of, causal mechanisms (Wade et al., 2026).

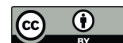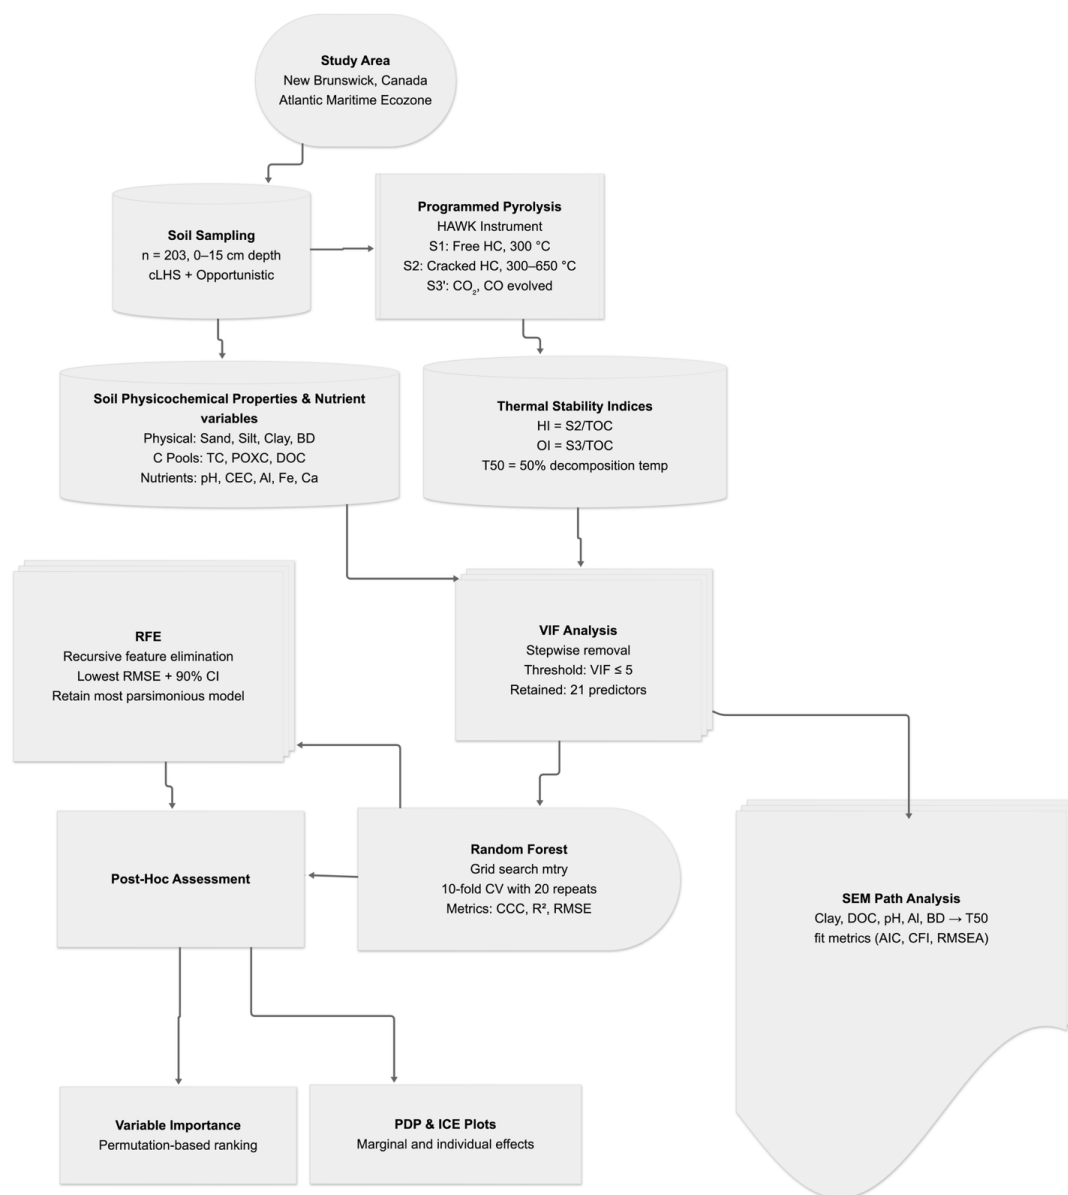

316

317 **Figure 2.** Methodological framework for predicting thermal stability indices using soil physicochemical  
318 properties and machine learning (ML) and structural equation model (SEM).

319 **3. RESULTS & DISCUSSION**

320 **3.1. Summary Statistics of Thermal Stability Indices**

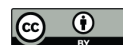

321 **Fig. 3** shows the boxplots and cumulative distribution functions (CDFs) for thermal stability indices  
322 derived from HAWK-programmed pyrolysis across New Brunswick soils. These indices include volatile  
323 hydrocarbons already present ( $S_1$ ), pyrolysate ( $S_2$ ), carbon dioxide ( $S_3$ ), hydrogen index (HI), oxygen  
324 index (OI), and  $T_{50}$  (temperature at which 50% of OM is pyrolyzed). Here, the result shows that HI and  
325  $S_2$  have broad interquartile ranges, indicating heterogeneity in **thermally stable, hydrogen-rich** SOC  
326 across sample locations (e.g., land uses; Barros et al., 2011; Gillespie et al., 2014). In contrast, the  
327 narrower distributions of OI and  $S_1$  suggest greater uniformity in volatile content and oxidation potential,  
328 potentially due to more consistent environmental or soil conditions across sites (Gao et al., 2015; Plante  
329 et al., 2009). The high median observed in  $T_{50}$  (around 350–420 °C) may suggest a significant presence  
330 of thermally stable SOC to readily decomposable SOC, which supports past studies indicating that higher  
331 pyrolysis temperatures correlate with stable, mineral-associated SOC in complex soils (Fernández et al.,  
332 2011, 2012; Kučerík et al., 2013, 2018; Peltre et al., 2013).

333 In the Supplementary Materials, we present violin boxplots and spatial distribution plots of  
334 thermal stability indices obtained from HAWK-programmed pyrolysis across various land use types  
335 (Figs. S1-S6). The plots revealed that the forest land use consistently showed higher  $T_{50}$  values and  
336 moderate-to-high  $S_2$ , suggesting greater thermal stability and a higher proportion of recalcitrant SOC,  
337 which may be due to the age of vegetation inputs, acidic conditions, and stronger organo-mineral  
338 associations that promote stabilization of thermally resistant carbon fractions (Gregorich et al., 2015).  
339 Agricultural land use exhibited lower and more varying  $T_{50}$  alongside high  $S_1$  and HI, reflecting  
340 disturbance from tillage, enhanced mineralization, and a greater contribution of labile, recently derived  
341 carbon pools from crop residues and amendments (Gregorich et al., 2015; Gillespie et al., 2014). The  
342 wetland ecosystem displayed a high  $S_2$  with variable  $T_{50}$ , confirming the accumulation of fresh, plant-  
343 derived organic matter under anoxic conditions that limit oxidative decomposition and support carbon  
344 sequestration despite lower thermal maturity in certain fractions (Gregorich et al., 2015). Pastures  
345 presented intermediate spatial distribution, with moderate  $T_{50}$  and HI influenced by perennial plant root  
346 inputs, grazing effects, and partial mineral protection mechanisms that stabilize organic matter to a  
347 degree between forest and cropland systems.



348

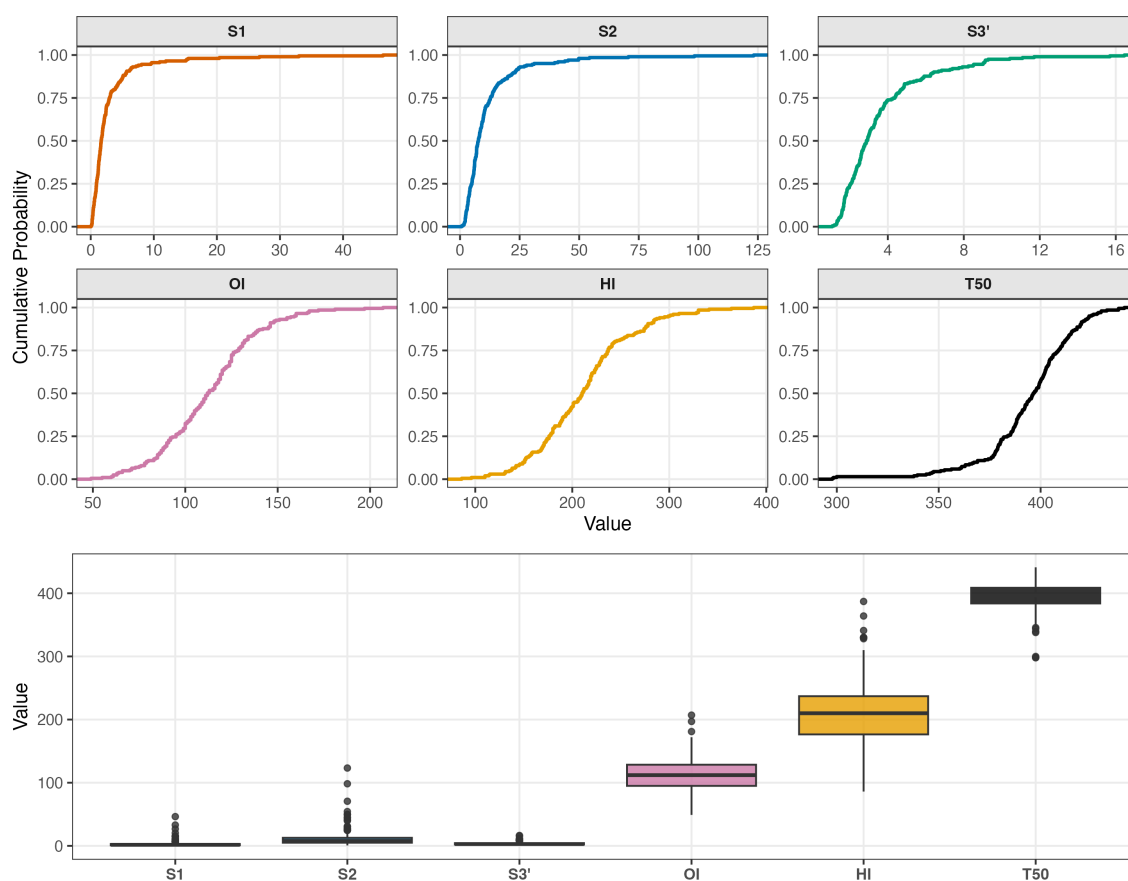

349

350 **Figure 3. Cumulative distribution function (CDF) plots (top) and boxplots (bottom) for thermal**  
 351 **stability indices derived from HAWK-Programmed Pyrolysis.** The indices include the S<sub>1</sub>, S<sub>2</sub>, S<sub>3</sub>,  
 352 OI, HI, and T<sub>50</sub>, which provide insights into the thermal degradation of SOC.

353 **3.2. Relationships between Thermal Stability and Physicochemical Properties of Soil**

354 **3.2.1. S<sub>1</sub>**

355 A negative correlation with soil pH ( $r = -0.33$ ) suggested that higher free hydrocarbon content is  
 356 associated with more acidic soils (Fig. 4). Strong positive correlations with total nitrogen (TN;  $r = 0.64$ )  
 357 and %C ( $r = 0.88$ ) indicate that elevated S<sub>1</sub> values correspond to nutrient-rich environments. Additional  
 358 positive correlations with clay ( $r = 0.38$ ), C:N ( $r = 0.53$ ), POXC ( $r = 0.70$ ), DOC ( $r = 0.85$ ), TDN ( $r =$   
 359  $0.31$ ), NH<sub>4</sub><sup>+</sup> ( $r = 0.58$ ), TON ( $r = 0.21$ ), and CEC ( $r = 0.40$ ) reinforce the association between S<sub>1</sub>, labile



360 carbon pools, and overall soil fertility. Collectively, these relationships highlight how free hydrocarbons  
361 in SOM reflect interactions among soil acidity, nutrient availability, and physical protection mechanisms  
362 (Berthrong et al., 2009, 2012).

### 363 3.2.2. S<sub>2</sub>

364 S<sub>2</sub> was significantly correlated with various soil physicochemical properties reflecting its link to  
365 kerogen-like, thermally labile hydrocarbons in SOM (Fig. 4). A moderate negative correlation with soil  
366 pH ( $r = -0.29$ ) suggests that acidic soils, where decomposition proceeds more slowly, tend to accumulate  
367 more S<sub>2</sub>-related organic matter (Disnar et al., 2003). The strong negative correlation with sand ( $r =$   
368  $-0.25$ ) indicates that finer-textured soils protect organic matter and thus have higher S<sub>2</sub> values, consistent  
369 with lower retention and stabilization capacities in sandy soils (Entio et al., 2024; Schmidt et al., 2011;  
370 Six & Paustian, 2014). Strong positive correlations were observed between S<sub>2</sub> and TN ( $r = 0.74$ ), TC ( $r$   
371  $= 0.92$ ), POXC ( $r = 0.77$ ), DOC ( $r = 0.81$ ), NH<sub>4</sub><sup>+</sup> ( $r = 0.49$ ), clay ( $r = 0.41$ ), Zn ( $r = 0.42$ ) and TIN ( $r =$   
372  $0.31$ ), indicating that S<sub>2</sub> tracks nutrient-rich carbon fractions associated with soil fertility (Culman et al.,  
373 2012).

374 In contrast, negative correlations with BD ( $r = -0.57$ ), Al ( $r = -0.34$ ), K<sub>sat</sub> ( $r = -0.22$ ), and  
375 Mg<sub>sat</sub> ( $r = -0.21$ ) suggest that BD soils and metal-rich environments, often associated with higher  
376 temperatures during the S<sub>2</sub> pyrolysis phase (650 °C) and may not favor the accumulation of kerogen-like  
377 material. This aligns with evidence that high BD and elevated soil temperatures promote SOM  
378 mineralization (Davidson & Janssens, 2006; Disnar et al., 2003).

### 379 3.2.3 S<sub>3</sub>

380 The indicator S<sub>3</sub> exhibited a positive correlation with fine-textured and chemically reactive soil  
381 components, such as clay ( $r = 0.30$ ) and silt ( $r = 0.32$ ). This suggests that particle size fractions play a  
382 crucial role in protecting the release of CO<sub>2</sub> from organic matter. Conversely, S<sub>3</sub> had a negative  
383 relationship with sand fractions ( $r = -0.38$ ) and BD ( $r = -0.52$ ), indicating a higher CO<sub>2</sub> release in coarse-  
384 textured soils. Among chemical properties, S<sub>3</sub> correlated positively with CEC ( $r \approx 0.56$ ), TC ( $r \approx 0.86$ ),  
385 TN ( $r = 0.90$ ), POXC ( $r = 0.84$ ), and DOC ( $r = 0.52$ ). This highlights that S<sub>3</sub> increases with organic  
386 matter content, and soils dominated by readily oxidizable carbon tend to accumulate less thermally stable  
387 material. Overall, these patterns suggest that S<sub>3</sub> was likely influenced by the type of organic matter  
388 formation in the soil, driven by fine texture, CEC, and labile carbon dynamics (Mesgar et al., 2024b).



389 3.2.4. *Oxygen Index (OI)*

390 OI showed a positive correlation with soil pH ( $r = 0.34$ ), indicating that higher OI values correspond to  
391 higher pH. This suggests that neutral to alkaline conditions may favor oxidative transformations of SOC  
392 (Wenyika et al., 2025). The negative correlation between OI and C:N ( $r = -0.35$ ) implies that increases  
393 were possibly associated with decreases in C:N, which could reflect greater nitrogen availability and  
394 enhanced microbial decomposition that promotes nutrient cycling and the accumulation of more  
395 oxidized residues (Cotrufo et al., 2013, 2022). However, these patterns contrasted with our study, in  
396 which lower C:N ratios (indicating higher nitrogen content and greater organic matter quality) were more  
397 often associated with higher HI and lower OI values. Higher nitrogen availability is typically linked to  
398 enrichment in labile, hydrogen-rich components such as O-alkyl-C and peptides, which contribute to  
399 elevated HI rather than OI (Mesgar et al., 2024b). The observed positive relationship between OI and  
400 lower C:N in this study may therefore be site-specific, potentially driven by land-use differences; for  
401 example, croplands often exhibit lower C:N and higher OI due to accelerated oxidative processing  
402 (Gillespie et al., 2014) or site-specific interactions in New Brunswick's soils. A positive correlation  
403 between OI and Al ( $r = 0.30$ ) further suggests that aluminum-rich soils may exhibit greater oxidative  
404 signatures, likely due to organo-mineral interactions that influence SOM stabilization and transformation  
405 pathways (Mesgar et al., 2024a; Mayer et al., 2023; Sparks, 1995; Wagai & Mayer, 2007).

406 3.2.5. *Hydrogen Index (HI)*

407 In Fig. 4, HI showed a negative correlation with BD ( $r = -0.38$ ), pH ( $r = -0.34$ ), and Al ( $r = -0.33$ ).  
408 This suggests that decreases in BD, pH, and Al levels were possibly associated with increases in HI.  
409 High HI is often characterized by less stable SOC or rapidly decomposable and unstable SOC, which  
410 may control BD variation (Yu et al., 2020). This result suggests that soils with higher compaction tend  
411 to contain SOC with lower hydrogen. This pattern may reflect reduced inputs of fresh, O-alkyl-C-rich  
412 organic matter and/or advanced decomposition under conditions of limited organic inputs. Increased  
413 bulk density is also associated with altered aggregation and mineral protection mechanisms, which can  
414 influence SOC composition and apparent stability rather than directly enhancing decomposability (Yu  
415 et al., 2020).

416 In contrast, HI showed a positive correlation with TC ( $r = 0.40$ ), TN ( $r = 0.30$ ), POXC ( $r = 0.30$ ),  
417 and DOC ( $r = 0.36$ ), reflecting the role of labile carbon fractions in supporting microbial activity, which  
418 may in turn enhance HI (Kögel-Knabner, 2002). It is important to note that HI reflects the chemical

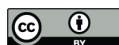

419 composition of SOC; higher HI content generally indicates a greater proportion of hydrogen-rich, labile  
420 components, such as aliphatic and O-alkyl-C functional groups. In contrast, soils with high SOC can still  
421 exhibit low HI if their carbon is dominated by condensed aromatic structures, which are hydrogen-poor  
422 and therefore do not contribute to elevated HI values (Moore et al., 2017).

423 A negative correlation between HI and AI ( $r = -0.33$ ) suggests that AI complexes are associated  
424 with organic matter of lower hydrogen richness, reflecting differences in molecular composition rather  
425 than lower organic matter content. In contrast, the positive correlation with cation exchange capacity  
426 (CEC;  $r = 0.27$ ) suggests that organic matter composition, particularly the presence of labile functional  
427 groups, may enhance the retention of exchangeable cations.

#### 428 3.2.6. $T_{50}$

429 We observed a positive correlation between  $T_{50}$  and soil pH ( $r = 0.48$ ), which suggests that more  
430 thermally stable SOC was prevalent in alkaline soils, likely due to reduced microbial decomposition  
431 rates under higher pH conditions, which promote SOC preservation (Almagro et al., 2021; Disnar et al.,  
432 2003; Solomon et al., 2012; Tao et al., 2023). However, we also noted that acidic soils could show strong  
433 SOC stability due to the presence of Fe and Al, which form strong organo-mineral bonds with organic  
434 matter, resulting in higher  $T_{50}$  values. Similarly, the positive correlation with BD ( $r = 0.36$ ) indicates  
435 that compacted soils tend to contain more thermally stable SOC, potentially because reduced pore space  
436 limits microbial access to organic substrates, favoring the accumulation of recalcitrant carbon fractions  
437 (Six et al., 2002).

438 Conversely,  $T_{50}$  showed negative correlations with TC ( $r = -0.46$ ) and C:N ( $r = -0.58$ ),  
439 suggesting that soils richer in labile SOC tend to have lower  $T_{50}$  values. Strong negative correlations  
440 with DOC ( $r = -0.60$ ) and POXC ( $r = -0.43$ ) further support this trend, implying that high  $T_{50}$  values  
441 are associated with soils containing fewer readily decomposable SOC pools, likely due to the preferential  
442 breakdown of easily accessible organic compounds (Barreto et al., 2021; Briedis et al., 2023; Liu et al.,  
443 2020). Additionally, the negative correlations with  $\text{NH}_4$  ( $r = -0.28$ ) and CEC ( $r = -0.44$ ) suggest that  
444 soils with higher  $T_{50}$  values yield a large proportion of recalcitrant SOC that has undergone advanced  
445 decomposition and releases its labile constituents (Cremer & Prietzel, 2017; Rakhsh et al., 2017).

446 In contrast,  $T_{50}$  showed a positive correlation with  $\text{P}_2\text{O}_5$  ( $r = 0.33$ ),  $\text{K}_{\text{sat}}$  ( $r = 0.33$ ),  $\text{Mg}_{\text{sat}}$  ( $r =$   
447  $0.33$ ),  $\text{Ca}_{\text{sat}}$  ( $r = 0.34$ ), and  $\text{base}_{\text{sat}}$  ( $r = 0.36$ ), respectively. This is likely due to stabilization  
448 mechanisms involving metal oxides and clay minerals, which protect SOC from microbial degradation

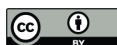

449 (Wagai & Mayer, 2007). Additionally, the negative correlation with % H ( $r = -0.36$ ) indicates that more  
 450 thermally stable organic matter has a lower hydrogen content, consistent with advanced decomposition  
 451 and oxidation processes that remove hydrogen-rich aliphatic compounds (Cecillon et al., 2018;  
 452 Gregorich et al., 2015; Li et al., 2020; Sebag et al., 2016). These findings highlight the complex  
 453 interactions between thermal stability, soil nutrient availability, and metal oxides, aligning with the  
 454 observations of Lehmann & Kleber (2015).

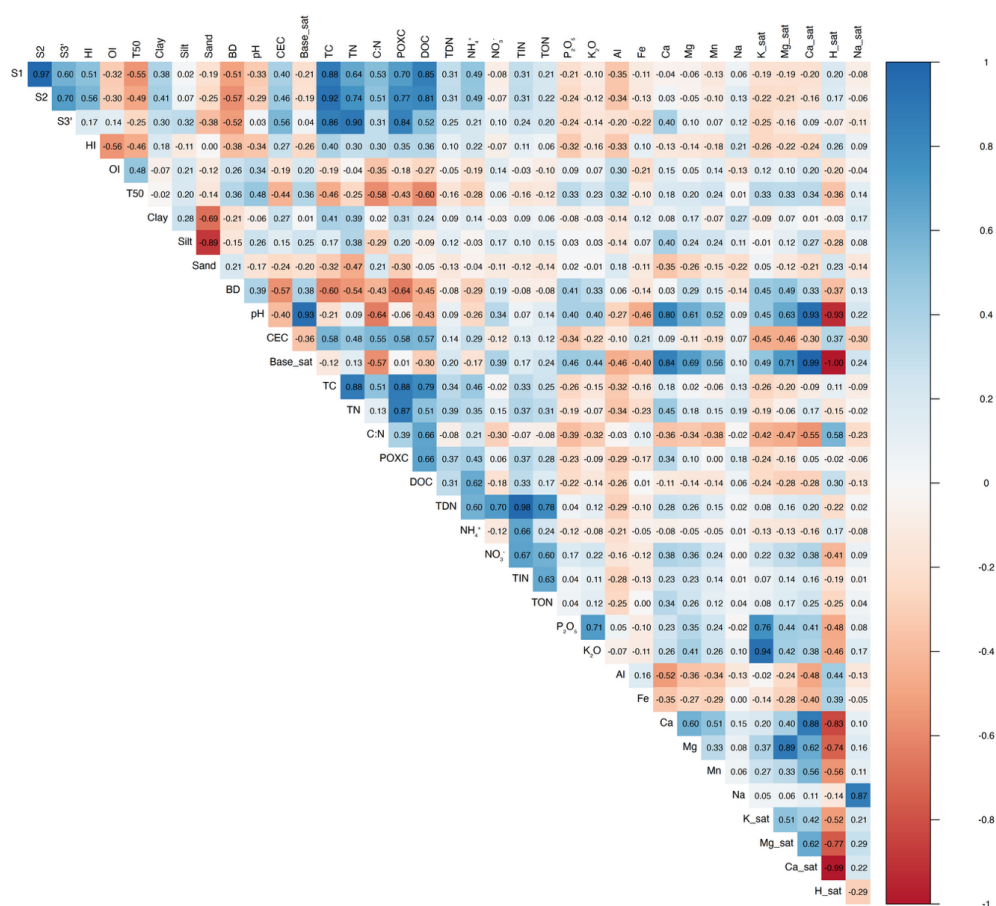

455 **Figure 4.** Correlation matrix between thermal stability indices and soil properties.  
 456

457 **3.3. Predictions of Thermal Stability Indices using Random Forest Learner**

458 Using the minimum number of covariates identified by RFE, we developed predictive models for each  
 459 thermal stability index ( $S_1$ ,  $S_2$ ,  $S_3'$ ,  $OI$ ,  $HI$ , and  $T_{50}$ ; see Fig. 5). Accuracy metrics are presented in Table  
 460 2, and model residual scatterplots in Fig. 5. The models for  $S_1$ ,  $S_2$ ,  $S_3'$ ,  $OI$ ,  $HI$ , and  $T_{50}$  showed the highest



461 accuracy, as reflected by their high CCC values ( $>0.80$ ), low RMSE, and bias, suggesting model  
462 consistency in capturing variations in SOC stability using thermal stability indicators and soil properties.  
463 In contrast, HI and OI had the lowest model performance ( $CCC \leq 0.48$ ). Additionally,  $T_{50}$  showed  
464 moderate accuracy, with CCC values ranging from 0.58 to 0.66. While these models provided important  
465 insights into SOC stability, they also suggested that incorporating additional variables, such as  
466 biological, climatic, and land use factors, could enhance predictive capabilities. These results corroborate  
467 previous studies on SOC dynamics and stabilization, where active or readily decomposable SOC  
468 fractions, mineral interactions, and soil structure are known to significantly influence carbon cycling,  
469 persistence, and storage in soils (Lal, 2004; Wiesmeier et al., 2019).

### 470 3.3.1. $S_1$ Model

471 The  $S_1$  model yielded higher accuracy metrics with a CCC of 0.85 and a low RMSE of 1.19 HC-mg/g-  
472 rock compared to both HI and OI (Table 2 and Fig. 5). The scatterplot for  $S_1$  showed that the regression  
473 line was close to 1:1, indicating a better model was obtained using the selected predictors. In addition,  
474 Fig. 6 shows the variable importance plot of the  $S_1$  model with POXC as the most important predictor  
475 with the highest importance score ( $> 90\%$ ), indicating that labile organic carbon strongly controls  $S_1$ .  
476 This was closely followed by DOC, which yielded an importance score of 85%, indicating that SOC  
477 stabilizes via mineral interactions and contributes to  $S_1$  variability. Also, it may be possible that at the  
478  $S_1$  temperature level, partially transformed hydrocarbon compounds become volatilized and hence  
479 contribute to the variability of  $S_1$  as an index in understanding the stability of C in soils. BD had a  
480 variable importance of 32%, likely due to its effect on microbial access to oxygen, which impacted SOC  
481 decomposition (Tao et al., 2023). CEC contributed 28% of the relative importance, suggesting that clay-  
482 mineral interactions play a moderate role in thermal indices prediction. The CEC's moderate  
483 contribution can vary depending on the type of clay present in the soil (Ma et al., 2024). Conversely, the  
484 C:N had an importance of 24%, indicating that, compared with other predictors in the model, it played  
485 a moderate role in distinguishing patterns potentially linked to nitrogen availability and the accumulation  
486 of more labile carbon. The result highlights that readily decomposable C has a relationship with the  $S_1$   
487 index, while BD and other soil properties play a secondary role in stabilizing SOC.

488 Fig. 7 presents PDP and ICE plots for  $S_1$  model predictions. In the  $S_1$  model, DOC and POXC  
489 showed a strong positive correlation, suggesting their significant role in hydrocarbon (HC) release below  
490  $300^\circ\text{C}$ , aligning with Leifeld et al. (2002) da Silva et al. (2025). Conversely, BD exhibited a declining



491 trend, indicating that compacted soil restricts microbial access to organic material, thereby stabilizing  
492 SOC and limiting labile carbon availability (Six et al., 2004; Six & Paustian, 2014). CEC and C:N  
493 displayed stable trends with slight increases, implying contributions from soil mineral interactions and  
494 nitrogen content.

### 495 3.3.2. *S<sub>2</sub> Model*

496 The *S<sub>2</sub>* model demonstrated high predictive accuracy with a CCC of 0.86 and RMSE of 4.01 HC-mg/g-  
497 rock (Table 2 and Fig. 5). The scatterplot showed close alignment between predicted and observed  
498 values, with the regression line approximating the 1:1 line. Variable importance analysis (Fig. 6)  
499 revealed that POXC was the dominant predictor, followed by DOC, BD, CEC, and C:N. This indicates  
500 that *S<sub>2</sub>*, which is hydrocarbons from thermal cracking of non-volatile organic matter, is strongly  
501 associated with labile carbon pools and soil physical properties.

502 Partial dependence plots (Fig. 7) showed that POXC had a strong positive relationship with  
503 predicted *S<sub>2</sub>* values, confirming that readily available carbon pools drive the formation of kerogen-like  
504 hydrocarbons. Conversely, BD exhibited a consistent negative trend, suggesting that soil compaction  
505 limits the accumulation or detection of these thermally labile fractions, likely through physical protection  
506 mechanisms that reduce microbial accessibility (Paul et al., 2006; De Neve & Hofman, 2000). CEC  
507 showed a moderate positive effect, consistent with organo-mineral interactions that stabilize organic  
508 matter decomposing at higher temperatures. The presence of trace elements, such as Mn and Zn among  
509 the predictors, suggests that redox-active elements may influence *S<sub>2</sub>* dynamics in certain environments,  
510 aligning with previous findings on trace metal involvement in SOC stabilization (Hall et al., 2016; Hall  
511 & Silver, 2015).

### 512 3.3.3. *S<sub>3</sub>' Model*

513 The *S<sub>3</sub>* model also exhibited strong predictive performance, with a CCC of 0.85 and RMSE of 1.09 mg-  
514 CO<sub>2</sub>/g-rock (Table 2 and Fig. 5). Variable importance analysis (Fig. 6) identified POXC as the most  
515 influential predictor (100%), followed by aggregate stability (61%) and CEC (41%). This indicates that  
516 *S<sub>3</sub>'*, representing CO<sub>2</sub> evolved from oxygen-containing functional groups, is primarily associated with  
517 labile organic matter, soil structural properties, and cation exchange capacity. These findings align with  
518 previous studies highlighting the rapid turnover and microbial accessibility of labile SOC as primary  
519 factors in decomposition and stabilization processes (Gillespie et al., 2014; Gregorich et al., 2015;  
520 Haynes, 2005). The importance of aggregate stability is supported by Bronick and Lal (2005), who



521 demonstrated that soil macro- and micro-aggregates protect SOC from microbial degradation, thereby  
522 reducing CO<sub>2</sub> emissions. Similarly, Six et al. (2002) showed that clay minerals and CEC significantly  
523 influence SOC stabilization through mineral-organic interactions.

524 Partial dependence plots (Fig. 7) revealed consistent patterns across the S<sub>3</sub> model: POXC showed  
525 a strong positive relationship with predicted values, while BD exhibited a negative trend. Feature  
526 interactions in the S<sub>3</sub> model aligned with established frameworks differentiating labile and mineral-  
527 associated organic matter pools in soil carbon dynamics (Cotrufo et al., 2013, 2019, 2022; Giannetta et  
528 al., 2018; King et al., 2024; Mitchell et al., 2020).

#### 529 3.3.4. OI Model

530 The OI model demonstrated moderate performance, with a CCC = 0.44 and an RMSE = 39.37 mg CO<sub>2</sub>  
531 /g TOC, explaining approximately 43% of the variance in OI. While the selected predictors contributed  
532 to OI estimation, a significant portion of variability remained unexplained. Among the predictors, total  
533 organic nitrogen was the most influential, contributing 100%, followed by NO<sub>3</sub> (95%) and Al (76%).  
534 This result aligns with previous studies (e.g., Smith et al., 2015; Murphy, 2014), highlighting the  
535 challenges of modeling complex soil processes due to soil heterogeneity. The variable importance plot  
536 (Fig. 6) further confirmed that organic matter and nutrient indicators, such as TIN, C:N, and DOC, play  
537 a crucial role in regulating biochemical transformations and CO<sub>2</sub> release during organic matter  
538 decomposition.

539 Additionally, soil texture and structural properties, including silt, BD, and aggregate stability,  
540 may control soil pores and diffusion pathways within the soil matrix, consistent with Dexter (2004).  
541 Chemical parameters, such as NO<sub>3</sub>, Fe, P<sub>2</sub>O<sub>5</sub>, Al, Zn, Na, and S, provided insights into soil nutrient status  
542 and indirectly affected microbial activity and oxygen dynamics. These findings support earlier reports  
543 by Havlin et al. (2013) emphasizing the intricate relationship between soil chemistry and biological  
544 activity.

545 In the PDP plots (Fig. 7) for the OI model, as total organic nitrogen decreased, NO<sub>3</sub> increased  
546 until both reached a stable state, underscoring the role of organic matter decomposition and oxidation.  
547 The influence of P<sub>2</sub>O<sub>5</sub> further suggests a connection to micronutrient availability, consistent with Kirkby  
548 et al. (2013). These results indicate that OI is primarily governed by nitrogen- and phosphate-related  
549 properties, mineral interactions, and soil texture, all of which influence soil organic matter oxidation and  
550 stability. Future improvements to the OI model could incorporate microbial enzymatic and



551 environmental variables (e.g., drainage) given the significant roles of iron, nitrate, and phosphate  
552 predictors.

553

### 554 3.3.5. HI Model

555 The HI model was developed using the minimum number of predictors: C:N, BD, NH<sub>4</sub>, Al, DOC,  
556 aggregate stability, P<sub>2</sub>O<sub>5</sub>, and Na, with a CCC of 0.48 and an RMSE of 39.4 mg HC/g TOC. The CCC  
557 of 0.48 for HI models reflects moderate agreement between predicted and observed values. The variable  
558 importance plot (Fig. 6) showed that NH<sub>4</sub> was the most important variable, with a 100% relative  
559 contribution to predicting HI. This was followed by C:N with 79%, closely marked by P<sub>2</sub>O<sub>5</sub> with ~76%,  
560 Al with ~57%, BD with ~34%, DOC with ~18%, and Na with ~5%. High HI values indicate less  
561 decomposed, hydrogen-rich organic matter, where mineralization can generate NH<sub>4</sub> and limited  
562 nitrification allows it to accumulate; thus, NH<sub>4</sub> is more likely a consequence of high-HI than a cause.

563 The C:N, the next important variable in the predictive model for HI, conforms with studies on  
564 SOC biogeochemical processes. For example, a lower C:N ratio indicates higher N availability, which  
565 can enhance microbial activity and decomposition of organic matter, potentially driving HI (Wu et al.,  
566 2023). HI informs the presence of labile functional groups with corresponding narrow C:N; hence, HI  
567 could be influenced by narrow C:N, suggesting that high N content in an SOC may lead to more  
568 hydrogen-rich compounds, thus driving HI.

569 In Fig. 7 for the PDP plots HI model, C:N exhibited a relatively stable trend with minor  
570 fluctuations, indicating a minimal effect on the HI index. In contrast, BD showed a stronger relationship  
571 with pyrolysis, likely due to its influence on microbial decomposition and organic matter stabilization.  
572 NH<sub>4</sub> initially displayed a sharp increase before stabilizing, suggesting its strong influence on thermal  
573 stability at the onset, potentially due to its role in raising pyrolysis temperature before stabilizing as  
574 hydrogen molecules were fully released. These findings align with Wang et al., (2023), who reported  
575 that ammonium perchlorate decomposition emits gases like HCN and CO<sub>2</sub> at high temperatures.

### 576 3.3.6. T<sub>50</sub> Model

577 In the T<sub>50</sub> model, the CCC values ranged from 0.58 to 0.66 (Table 2 and Fig. 5), where the most  
578 significant variable was NH<sub>4</sub>, which was followed by aggregate stability at 89% and DOC at 85 %. Al  
579 had a moderate importance level of 34 %, while permanganate oxidizable C showed no relationship with



580 T<sub>50</sub> estimation. These results suggest that higher levels of dissolved carbon likely lower the temperature  
 581 at which 50% of SOC degrades because labile dissolved carbon decomposes at lower temperatures,  
 582 aligning with previous findings that indicate dissolved carbon can be used to predict SOC stability (Nie  
 583 et al., 2019; Zhang et al., 2019).

584 **Fig. 7** also shows the PDP for the T<sub>50</sub> model, highlighting the contribution of each predictor in  
 585 the prediction. As shown, predictors connected with labile carbon pools yielded negative relationships  
 586 with T<sub>50</sub>. The predictors associated with more labile carbon pools generally show negative partial  
 587 dependence, explaining that increases in variables such as DOC, C:N, and NH<sub>4</sub> are linked to lower  
 588 predicted T<sub>50</sub> values. In addition, the model predicts that soils with high amounts of labile organic matter  
 589 tend to exhibit lower temperatures of decomposition, reflecting reduced thermal stability. This finding  
 590 is also consistent with Hou et al., (2021), who noted that active carbon pools like dissolved C reduce  
 591 SOM stability in alpine soils due to their susceptibility to microbial degradation. The increasing trend  
 592 indicates that the presence of Al, likely in the form of reactive oxides, contributes to SOC stability  
 593 (Gregorich et al., 2015; Schmidt et al., 2011). **Further emphasized that SOC stability depends more on**  
 594 **mineral protection than on functional groups (Plante et al. (2011)).**

595

596 **Table 2.** Accuracy metrics of the predictive models of thermal stability indices

| Thermal Stability Indices | r <sup>2</sup> | Adj.r <sup>2</sup> | CCC  | RMSE  | Bias  | MAE   |
|---------------------------|----------------|--------------------|------|-------|-------|-------|
| S <sub>1</sub>            | 0.76           | 0.76               | 0.85 | 1.19  | -0.01 | 0.79  |
| S <sub>2</sub>            | 0.77           | 0.77               | 0.86 | 4.01  | 0.01  | 2.78  |
| S <sub>3</sub>            | 0.77           | 0.77               | 0.85 | 1.09  | -0.01 | 0.78  |
| OI                        | 0.32           | 0.32               | 0.44 | 21.86 | 0.42  | 16.52 |
| HI                        | 0.33           | 0.33               | 0.48 | 39.37 | 0.81  | 30.57 |
| T <sub>50</sub>           | 0.42           | 0.42               | 0.58 | 15.96 | -0.24 | 11.85 |

597 **Note:** Coefficient of determination (R<sup>2</sup>), adjusted coefficient of determination (Adj. R<sup>2</sup>), Lin's  
 598 concordance correlation coefficient (CCC), root mean square error (RMSE), bias, mean absolute error  
 599 (MAE).  
 600

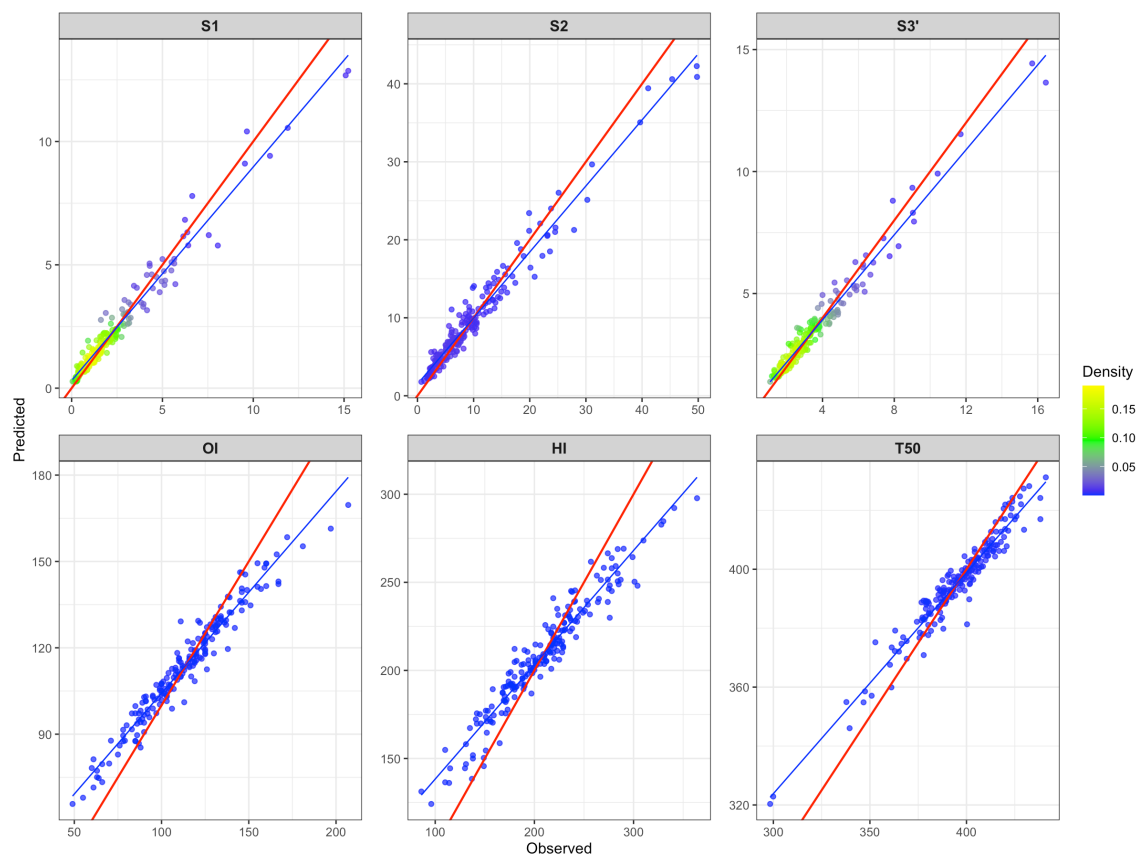

601  
602  
603  
604  
605

**Figure 5. Scatterplot of the predicted versus observed data of the thermal stability indices: S<sub>1</sub> (HC-mg/g-rock), S<sub>2</sub> (HC-mg/g-rock), S<sub>3'</sub> (mg-CO<sub>2</sub>/g-rock), OI (O<sub>2</sub>-mg/g TOC), HI (HC-mg/g TOC), & T<sub>50</sub> (°C). The red line represents the 1:1 line, and the blue line represents the line of best fit between observed and predicted values.**



606

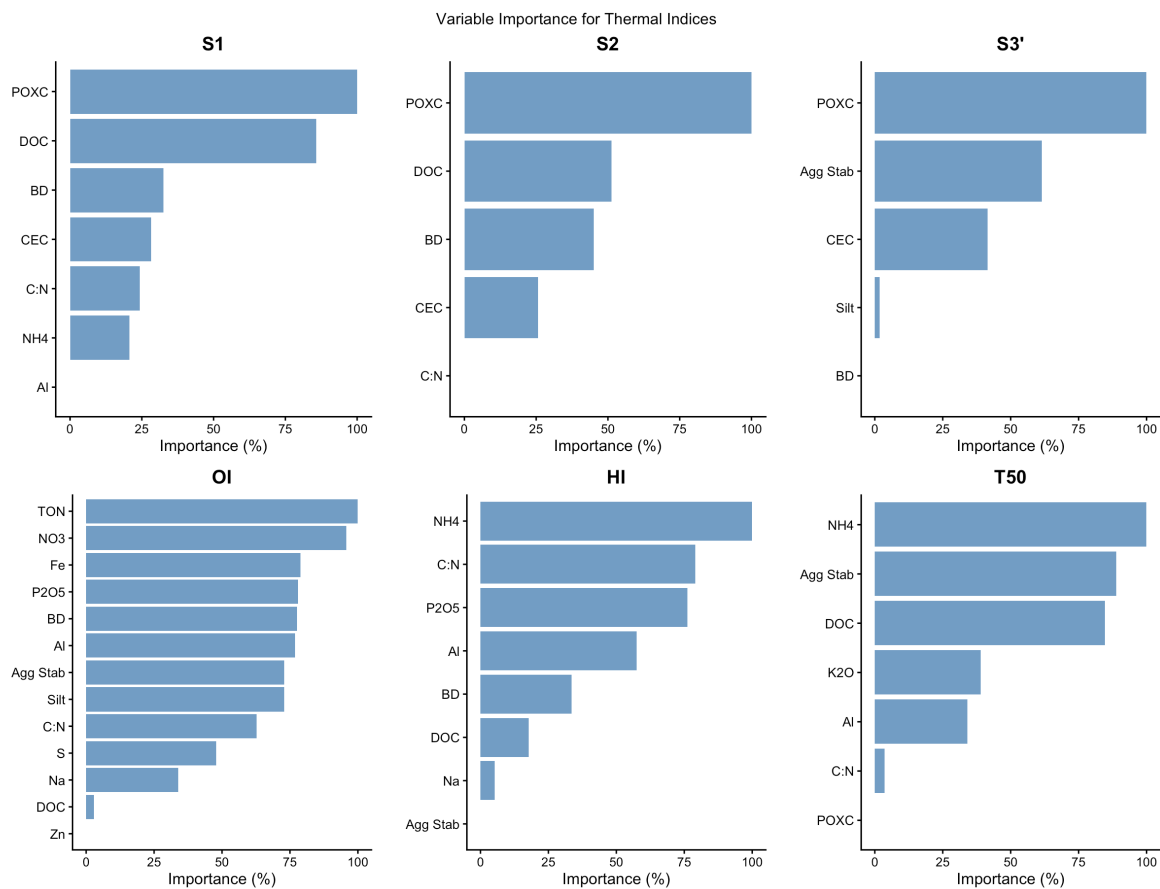

607

608

609

**Figure 6.** Permutation-based, relative variable importance plots for predicting thermal stability indices using physicochemical properties of soils.

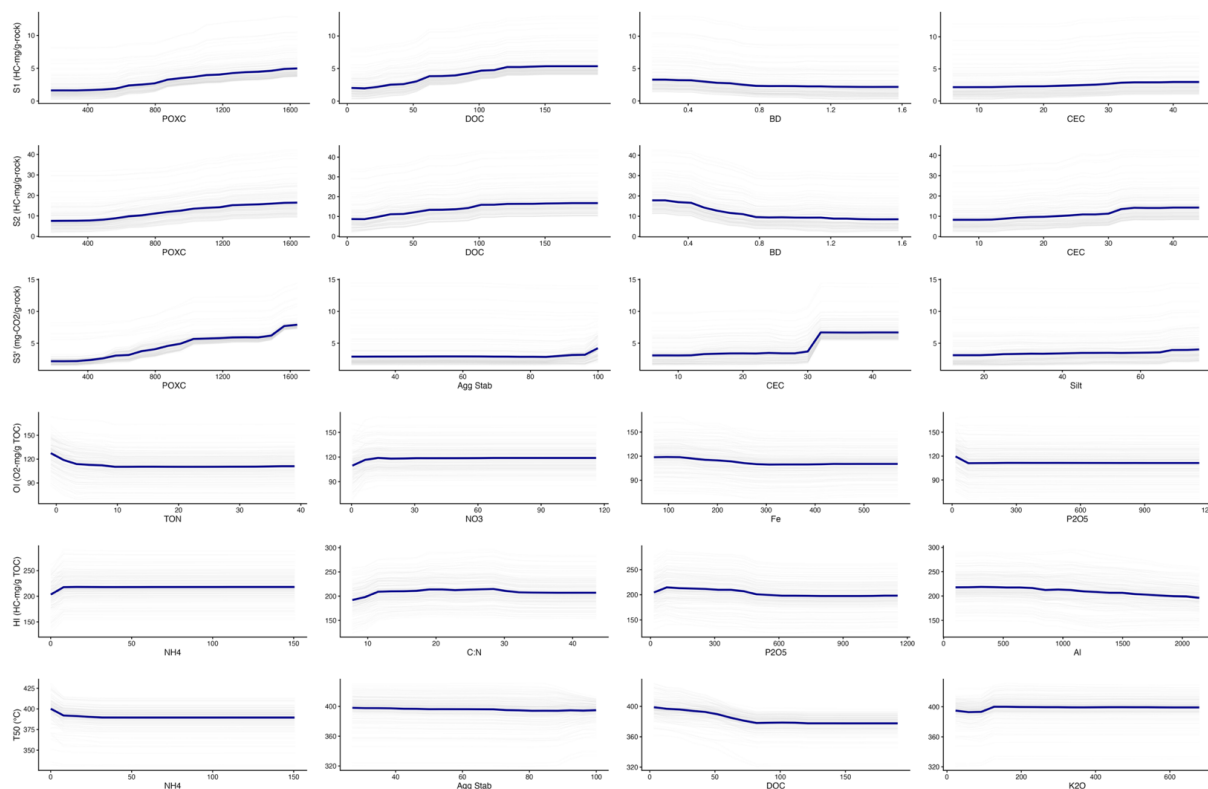

610  
 611 **Figure 7. Partial dependence plots generated for the top four most important predictors of**  
 612 **thermal stability indices.** The grey lines represent the ICE curves, and the blue line represents the  
 613 average of the Individual Conditional Expectation ICE lines.  
 614

615 **3.5. Structural Equation Modelling**

616 We present our SEM as a hypothesis-testing framework that reveals patterns of association rather  
 617 than demonstrating causation. Our *a priori* model was grounded in soil biogeochemical theory, with  
 618 individual paths representing hypothesized relationships informed by existing literature (H<sub>1</sub>: physical  
 619 protection, Six et al., 2004; H<sub>2</sub>: carbon quality, Lehmann & Kleber, 2015; H<sub>3</sub>: pH effects, Rowley et al.,  
 620 2018; H<sub>4</sub>: mineral reactivity, Kleber et al., 2007; H<sub>5</sub>: physical structure, Dungait et al., 2012; Tables 3-5  
 621 & Fig. 8). Our results demonstrated excellent global fit (CFI = 1.0, RMSEA = 0.0, SRMR < 0.001),  
 622 satisfying recommended thresholds (CFI ≥ 0.90, RMSEA ≤ 0.08, SRMR ≤ 0.10; Hu & Bentler, 1999;  
 623 Wade et al., 2026). However, we acknowledge that the saturated nature of our model (df = 0) reflects its  
 624 simplicity rather than definitive evidence of causal structure.



625 Our *a priori* hypothesis model explained 53.5% of variance in  $T_{50}$ , with cross-validation  
626 confirming robustness (10-fold CV with 20 repeats  $r^2 = 0.538 \pm 0.03$ ; CCC = 0.73, 95% CI: 0.68–0.78).  
627 Hypothesis testing supported four of five predicted directional relationships:  $H_1$  (clay content showed a  
628 significant positive interaction with  $T_{50}$ ,  $\beta = 0.152$ ,  $p = 0.002$ ),  $H_2$  (DOC; dissolved organic carbon  
629 showed a significant negative relationship with  $T_{50}$ ,  $\beta = -0.319$ ,  $p < 0.001$ ),  $H_3$  (soil pH showed a  
630 significant positive relationship with  $T_{50}$ ,  $\beta = 0.436$ ,  $p < 0.001$ ), and  $H_4$  (Al; aluminum showed a  
631 significant positive interaction with  $T_{50}$ ,  $\beta = 0.379$ ,  $p < 0.001$ ). However,  $H_5$  (bulk density) was not  
632 supported ( $\beta = 0.057$ ,  $p = 0.305$ ), indicating that physical structure, as measured by density, may be  
633 secondary to chemical factors in its relationship with thermal stability.

634 We further tested competing configurations using mediation analysis ( $H_6$ – $H_7$ ; Fig. 9) and an  
635 exploratory model that included POXC, C:N, and  $P_2O_5$ . Clay content showed significant  
636 indirect interaction via DOC (indirect  $\beta = -0.074$ ,  $p = 0.033$ ), and pH demonstrated  
637 indirect associations through both DOC (indirect  $\beta = 0.142$ ,  $p = 0.002$ ) and aluminum (indirect  $\beta = -$   
638  $0.113$ ,  $p < 0.001$ ), with a substantial total association ( $\beta = 0.501$ ,  $p < 0.001$ ). These mediation pathways  
639 illustrate the complex interplay among soil properties that simple bivariate correlations cannot capture.  
640 However, we caution that temporal precedence, a key criterion for causal inference (Hill, 1965; Wade et  
641 al., 2026), cannot be established from our single time-point sampling. Thus, while our results are  
642 consistent with the hypothesized directional relationships, they represent interaction evidence that  
643 contributes to, but does not definitively establish, causal understanding.

644 Model robustness was assessed through multiple approaches: (1) bootstrapped standard errors ( $n$   
645 = 1000) for mediation paths, (2) 10-fold cross-validation (CV) with 20 repeats ( $R^2 = 0.538$ , RMSE =  
646  $17.92 \pm 1.2$ ), and (3) examination of residual correlations (all  $< 0.10$ ), indicating acceptable local fit). The  
647 exploratory model incorporating POXC, C:N, and  $P_2O_5$  increased explained variance to 57.2% but  
648 reduced parsimony, with only POXC showing a significant association ( $\beta = -0.259$ ,  $p < 0.001$ ).  
649 Following Wade et al.'s (2026) guidance on distinguishing confirmatory from exploratory analyses, we  
650 present these exploratory findings as hypothesis-generating rather than confirmatory, requiring  
651 validation in future studies. Collectively, our results demonstrate that pH, aluminum, and dissolved  
652 carbon are primary drivers of SOC thermal stability, with clay playing a complex mediating role.  
653 Consistent with Wade et al. (2026), who caution that any single analytical approach cannot confirm  
654 causal relationships, we position our findings as one line of correlational evidence contributing to an  
655 accumulating knowledge base on SOC stabilization.



656  
657

**Table 3.** Standardized path coefficients ( $\beta$ ) and bootstrapped standard errors (SE) from SEM showing pathways to SOC thermal stability

| Predictors                    | Std. Coefficient | SE   | <i>p</i> -Value |
|-------------------------------|------------------|------|-----------------|
| <i>a priori</i> Effects       |                  |      |                 |
| pH                            | 0.44             | 0.06 | 0.001           |
| Al                            | 0.38             | 0.06 | 0.001           |
| DOC                           | -0.32            | 0.06 | 0.001           |
| Clay                          | 0.15             | 0.05 | 0.001           |
| BD                            | 0.06             | 0.06 | ns <sup>5</sup> |
| Exploratory Effects           |                  |      |                 |
| pH                            | 0.46             | 0.08 | 0.001           |
| Al                            | 0.36             | 0.05 | 0.001           |
| POXC                          | -0.26            | 0.08 | 0.001           |
| Clay                          | 0.16             | 0.05 | 0.01            |
| DOC                           | -0.16            | 0.07 | 0.05            |
| C:N                           | -0.12            | 0.07 | ns <sup>5</sup> |
| BD                            | -0.11            | 0.07 | ns <sup>5</sup> |
| P <sub>2</sub> O <sub>5</sub> | 0.04             | 0.05 | ns <sup>5</sup> |

658 Note: <sup>5</sup>ns = not significant

659

660

661

662

663 **Table 4.** Summary of hypothesis tests evaluating direct and indirect pathways in SEM of SOC thermal  
664 stability

| Hypothesis     | Description                                  | Prediction | Effect Size | <i>p</i> -Value | Confirmed               |
|----------------|----------------------------------------------|------------|-------------|-----------------|-------------------------|
| H <sub>1</sub> | Clay ~ T <sub>50</sub> – Physical protection | positive   | 0.152       | 0.00            | Yes (direction correct) |
| H <sub>2</sub> | DOC ~ T <sub>50</sub> – Labile carbon        | negative   | -0.319      | 0.00            | Yes (direction correct) |
| H <sub>3</sub> | pH ~ T <sub>50</sub> – Acidity               | positive   | 0.436       | 0.00            | Yes (direction correct) |
| H <sub>4</sub> | Al ~ T <sub>50</sub> – Mineral reactivity    | positive   | 0.379       | 0.00            | Yes (direction correct) |
| H <sub>5</sub> | BD ~ T <sub>50</sub> – Structure             | positive   | 0.057       | 0.31            | No (not significant)    |
| H <sub>6</sub> | Clay indirect effects via DOC and Al         | mediation  | 0.048       | 0.03            | Yes                     |
| H <sub>7</sub> | pH indirect effects via DOC and Al           | mediation  | 0.241       | 0.00            | Yes                     |



665 Note: Standardized coefficients represent the strength of association. For mediation hypotheses,  
 666 coefficients represent the indirect effect magnitude. Supported hypotheses indicate statistical  
 667 significance ( $p < 0.05$ ) and direction consistent with predictions  
 668

669 **Table 5.** Goodness-of-fit statistics for confirmatory, exploratory, and mediation SEM predicting SOC  
 670 thermal stability

| Model                      | Type                         | <sup>6</sup> AIC | <sup>7</sup> BIC | <sup>8</sup> CFI | <sup>9</sup> RMSEA | R <sup>2</sup> |
|----------------------------|------------------------------|------------------|------------------|------------------|--------------------|----------------|
| <i>a priori</i> Hypothesis | Confirmatory (theory-driven) | 433.51           | 456.70           | 1.00             | 0.00               | 0.54           |
| Exploratory                | Exploratory                  | 422.84           | 455.97           | 1.00             | 0.00               | 0.57           |
| Mediation                  | Confirmatory (mediation)     | 1520.82          | 1557.27          | 0.86             | 0.41               | 0.49           |

671 Note: <sup>6</sup>Lower AIC values indicate better fit; <sup>7</sup>Lower BIC values indicate better fit; <sup>8</sup>CFI  $\geq 0.90$

672 acceptable,  $\geq 0.95$  good fit; <sup>9</sup>RMSEA  $\leq 0.08$  acceptable,  $\leq 0.05$  good fit

673

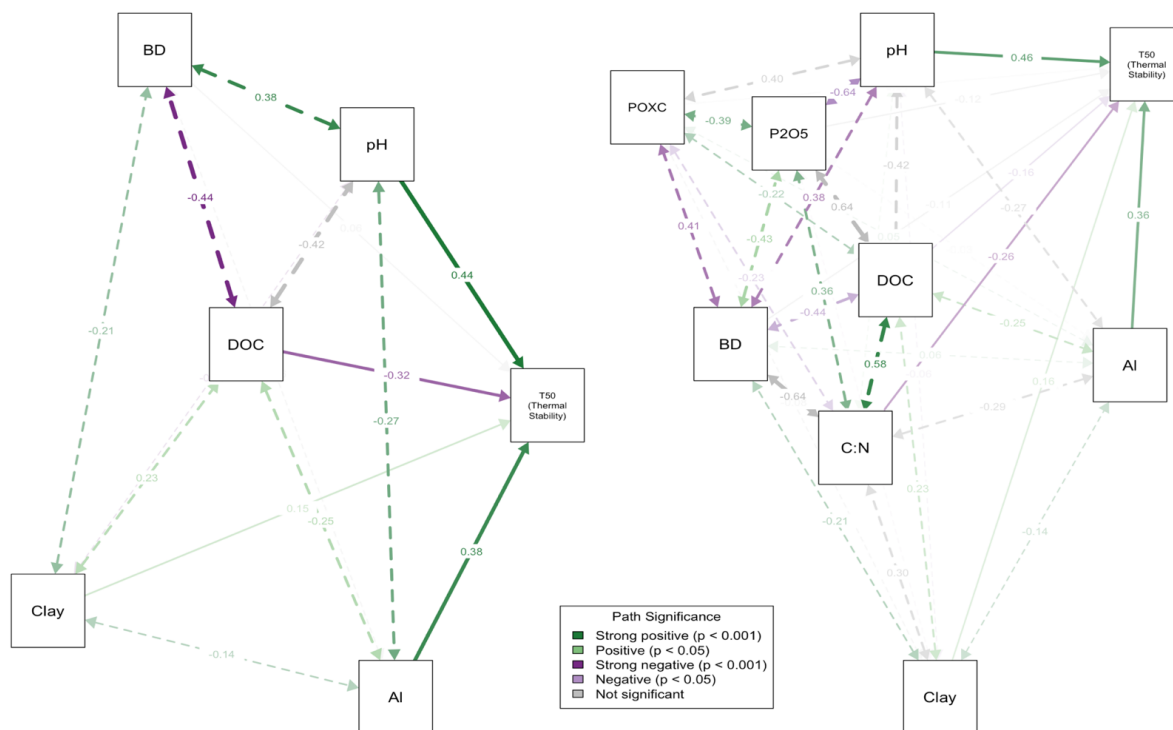

674

675 **Figure 8.** Path diagram from structural equation modeling (SEM) showing the  
 676 multivariate relationship between soil properties and thermal stability (T<sub>50</sub>).

677 Note: Green arrows indicate significant positive relationships ( $p < 0.001$ , thick;  $p < 0.05$ , thin); purple  
 678 arrows indicate significant negative relationships. Values adjacent to arrows are standardized path  
 679 coefficients, representing the strength of association between variables. The model explains 53.5% of  
 680 the variance in T<sub>50</sub> ( $R^2 = 0.54$ ). Solid arrows represent direct effects, while dashed arrows



681 represent indirect pathways, meaning the predictors influence  $T_{50}$  *via* one or more mediators rather  
682 than directly.  
683

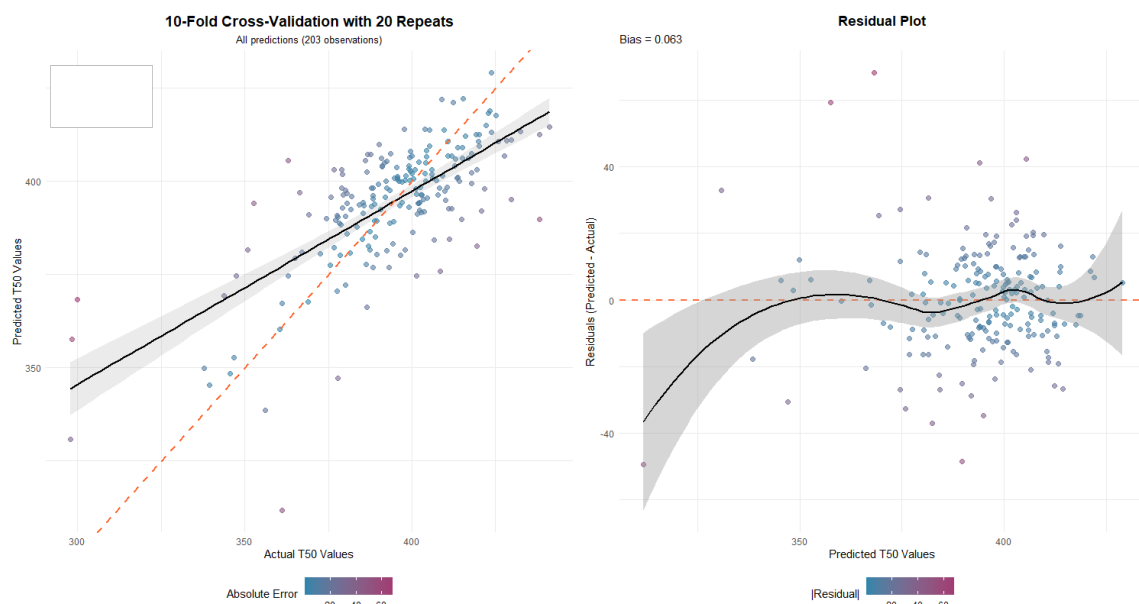

684

685 **Figure 9. Model performance evaluation for the structural equation model (SEM) predicting**  
686 **thermal stability( $T_{50}$ ) using 10-fold cross-validation repeated 20 times ( $n = 203$  sample points).**  
687 Left: 1:1 scatterplot of observed vs. predicted  $T_{50}$  values with identity line (solid black), regression fit  
688 (gray), and 1:1 dashed reference; points colored by absolute error magnitude. Right: Residual plot  
689 (predicted – actual) showing low overall bias (0.063) and minimal systematic patterns across predicted  
690 values.  
691



692 **4. CONCLUSIONS**

693 **In conclusion**, assessing SOC stability is essential for understanding carbon sequestration  
694 potential and its response to environmental change. Our analysis of thermal stability indices from  
695 HAWK-programmed pyrolysis revealed distinct patterns across land uses. Forest soils showed higher  
696  $T_{50}$  with moderate to high  $S_2$ , consistent with greater thermal stability and more recalcitrant SOC.  
697 Agricultural land use yielded lower and more variable  $T_{50}$  with correspondingly high  $S_1$  and HI,  
698 suggesting associations with disturbance-driven decomposition and labile carbon pools. Wetlands  
699 exhibited high  $S_2$  with variable  $T_{50}$ , consistent with fresh organic matter accumulation under anaerobic  
700 conditions. Pasture sites showed intermediate values, with moderate  $T_{50}$  and HI related to perennial root  
701 inputs, grazing, and partial mineral protection.

702 Using **random forest** modeling, we identified several soil properties—including bulk density,  
703 permanganate oxidizable carbon (POXC), cation exchange capacity (CEC), and nutrient content—that  
704 showed strong associations with thermal stability indices. Our findings detail how soil properties relate  
705 to SOC stability through organo-mineral interactions, microbial activity, and soil structure. The  
706 positive correlation between aluminum and thermal stability indices suggests that Al plays a role in SOC  
707 stabilization, reflected in higher thermal decomposition temperatures.

708 Partial dependence plots (**PDP**) and individual conditional expectation (ICE) plots revealed  
709 nonlinear relationships between key predictors, enhancing our understanding of thermal  
710 decomposition patterns across temperature ranges. Additionally, our SEM analysis supported  
711 hypothesized directional relationships: clay and pH showed direct positive associations with  $T_{50}$ , while  
712 dissolved organic carbon showed a direct negative association with  $T_{50}$ . Mediation analysis further  
713 revealed indirect pathways through which clay and pH relate to  $T_{50}$  via dissolved carbon and aluminum.  
714 These results demonstrate that HAWK-programmed pyrolysis thermal stability indices are related  
715 to measurable soil properties, capturing complex soil interactions and providing insights into SOC  
716 stability.

717 We also identified limitations, particularly the modest predictive performance for OI, suggesting  
718 that additional variables (e.g., microbial biomass, enzymatic activity, climate, topography, land use) may  
719 better capture SOC oxidation processes. Future research should refine predictive models for lower-  
720 performing thermal stability indices using theory-based variables and assess their transferability across  
721 regions and soil types. Additionally, we recommend testing hypothesized relationships for other thermal



722 indicators to further elucidate multivariate associations between soil properties and SOC thermal  
723 stability. Further investigation into mineral-organic interactions, particularly in soils with high clay  
724 content or reactive minerals, will help clarify their role in SOC stabilization. Addressing these gaps will  
725 enhance predictive modeling of thermal indices, providing a framework for monitoring SOC  
726 sequestration and stability.

#### 727 **CODE AND DATA AVAILABILITY**

728 Data will be made available upon reasonable request but are not available in any online repository to  
729 protect the privacy concerns of the participants in this project.

#### 730 **SUPPLEMENT**

731 The supplementary Tables and Figures related to this article are attached along with the manuscript text

#### 732 **AUTHOR CONTRIBUTIONS**

733 KJ, TP, BH, AWG, LPC, and DHL conceptualized the study. LPC contributed to the design of the soil  
734 sampling and analytical framework. KJ, TP, and BH conducted the data analysis and modelling, with  
735 input from AWG, MM, LPC, and DHL. KJ prepared the original manuscript draft. All authors  
736 contributed to the interpretation of the results, reviewed and edited the manuscript, and approved the  
737 final version for submission.

#### 738 **DECLARATION OF COMPETING INTEREST**

739 The authors declare that they have no known competing financial interests or personal relationships that  
740 could have appeared to influence the work reported in this paper.

#### 741 **ACKNOWLEDGEMENTS**

742 We are very grateful to all landowners who have given us access to their property to collect soil samples.  
743 For soil sample collection and general soil analyses, we would like to thank: Technicians Kyle  
744 MacKinley, Karen Terry, Mohammad Islam, and Pam MacKinley; Students Vanessa Mossman,  
745 Valentin Nugues, Erika Young, Matthew A.C. Milne, Kayli McGarrigle, Allysia Murphy, Simon  
746 Bertheleme, Violet Eliza-Sioux James, and Madison White. The authors recognize funding received  
747 through the Sustainable Agriculture Research Initiative Grant (ALLRP 588521-23), supported jointly by  
748 the Natural Sciences and Engineering Research Council of Canada (NSERC), the Social Sciences and



749 Humanities Research Council (SSHRC), and Agriculture and Agri-Food Canada. This research was  
750 undertaken, in part, thanks to funding from the Canada Research Chairs Program awarded to Heung.

751

## 752 REFERENCES

753

754 Almagro, M., Ruiz-Navarro, A., Díaz-Pereira, E., Albaladejo, J., and Martínez-Mena, M.: Plant residue  
755 chemical quality modulates the soil microbial response related to decomposition and soil  
756 organic carbon and nitrogen stabilization in a rainfed Mediterranean agroecosystem, *Soil Biol.*  
757 *Biochem.*, 156, 108198, <https://doi.org/10.1016/j.soilbio.2021.108198>, 2021.

758 An, Z., Pokharel, P., Plante, A. F., Bork, E. W., Carlyle, C. N., Williams, E. K., & Chang, S. X.: Soil  
759 organic matter stability in forest and cropland components of two agroforestry systems in  
760 western Canada. *Geoderma*, 433, 116463, 2023

761 Apley, D. W., and Zhu, J.: Visualizing the Effects of Predictor Variables in Black Box Supervised  
762 Learning Models, *J. R. Stat. Soc. Ser. B Stat. Methodol.*, 82(4), 1059-1086,  
763 <https://doi.org/10.1111/rssb.12377>, 2020.

764 Arbor, A., Schmidt, M., Saurette, D., Zhang, J., Bulmer, C., Filatow, D., Kasraei, B., Smukler, S., and  
765 Heung, B.: A framework for recalibrating pedotransfer functions using nonlinear least squares  
766 and estimating uncertainty using quantile regression, *Geoderma*, 439, 116674,  
767 <https://doi.org/10.1016/j.geoderma.2023.116674>, 2023.

768 Arbor, A., Schmidt, M., Zhang, J., Bulmer, C., Filatow, D., Kasraei, B., Smukler, S., and Heung, B.:  
769 Filling the gaps in soil data: A multi-model framework for addressing data gaps using  
770 pedotransfer functions and machine-learning with uncertainty estimates to estimate bulk  
771 density, *Catena*, 245, 108310, <https://doi.org/10.1016/j.catena.2024.108310>, 2024.

772 Barreto, M. S. C., Elzinga, E. J., Ramlogan, M., Rouff, A. A., and Alleoni, L. R. F.: Calcium enhances  
773 adsorption and thermal stability of organic compounds on soil minerals, *Chem. Geol.*, 559,  
774 119804, <https://doi.org/10.1016/j.chemgeo.2020.119804>, 2021.

775 Barreto, M. S. C., Ramlogan, M., Oliveira, D. M. S., Verburg, E. E. J., Elzinga, E. J., Rouff, A. A.,  
776 Jemo, M., and Alleoni, L. R. F.: Thermal stability of soil organic carbon after long-term  
777 manure application across land uses and tillage systems in an oxisol, *Catena*, 200, 105164,  
778 <https://doi.org/10.1016/j.catena.2021.105164>, 2021.

779 Barros, N., Salgado, J., Villanueva, M., Rodríguez-Añón, J., Proupin, J., Feijóo, S., and Martín-Pastor,  
780 M.: Application of DSC–TG and NMR to study the soil organic matter, *J. Therm. Anal.*  
781 *Calorim.*, 104(1), 53-60, <https://doi.org/10.1007/s10973-010-1163-4>, 2011.

782 Barré, P., Cécillon, L., and Kanari, E.: Characterization and Evaluation of the Stability of Soil Organic  
783 Matter, *The Rock-Eval Method*, 181-207, <https://doi.org/10.1002/9781394256235.ch10>, 2024.

784 Baudin, F., Disnar, J. R., Aboussou, A., and Savignac, F.: Guidelines for Rock–Eval analysis of recent  
785 marine sediments, *Org. Geochem.*, 86, 71-80,  
786 <https://doi.org/10.1016/j.orggeochem.2015.06.009>, 2015.



- 787 Berthrong, S. T., Jobbágy, E. G., and Jackson, R. B.: A global meta-analysis of soil exchangeable  
788 cations, pH, carbon, and nitrogen with afforestation, *Ecol. Appl.*, 19(8), 2228-2241,  
789 <https://doi.org/10.1890/08-1730.1>, 2009.
- 790 Berthrong, S. T., Piñeiro, G., Jobbágy, E. G., and Jackson, R. B.: Soil C and N changes with  
791 afforestation of grasslands across gradients of precipitation and plantation age, *Ecol. Appl.*,  
792 22(1), 76-86, <https://doi.org/10.1890/10-2210.1>, 2012.
- 793 Bouma, J.: Using Soil Survey Data for Quantitative Land Evaluation, *Advances in Soil Science*, 177-  
794 213, [https://doi.org/10.1007/978-1-4612-3532-3\\_4](https://doi.org/10.1007/978-1-4612-3532-3_4), 1989.
- 795 Breiman, L., Friedman, J. H., Olshen, R. A., and Stone, C. J.: Classification and regression trees,  
796 Wadsworth International Group, Belmont, California, 1984.
- 797 Breiman, L.: Random forests, *Machine Learning*, 45, 5–32, <https://doi.org/10.1023/A:1010933404324>,  
798 2001.
- 799 Briedis, C., de Moraes Sá, J. C., Lal, R., de Oliveira Ferreira, A., Franchini, J. C., and Milori, D. M. B.  
800 P.: Preservation of labile organic compounds is the pathway for carbon storage in a 23-year  
801 continuous no-till system on a Ferralsol in southern Brazil, *Geoderma Regional*, 33, e00643,  
802 <https://doi.org/10.1016/j.geodrs.2023.e00643>, 2023.
- 803 Bronick, C., and Lal, R.: Soil structure and management: a review, *Geoderma*, 124(1-2), 3-22,  
804 <https://doi.org/10.1016/j.geoderma.2004.03.005>, 2005.
- 805 Casalicchio, G., Molnar, C., and Schratz, P.: iml: Interpretable Machine Learning, CRAN: Contributed  
806 Packages, <https://doi.org/10.32614/cran.package.iml>, 2018.
- 807 Cécillon, L., Baudin, F., Chenu, C., Houot, S., Jolivet, R., Kätterer, T., Lutfalla, S., Macdonald, A., van  
808 Oort, F., Plante, A. F., Savignac, F., Soucémarianadin, L. N., and Barré, P.: A model based on  
809 Rock-Eval thermal analysis to quantify the size of the centennially persistent organic carbon  
810 pool in temperate soils, *Biogeosciences*, 15(9), 2835-2849, [https://doi.org/10.5194/bg-15-2835-](https://doi.org/10.5194/bg-15-2835-2018)  
811 2018, 2018.
- 812 Cotrufo, M. F., Haddix, M. L., Kroeger, M. E., and Stewart, C. E.: The role of plant input physical-  
813 chemical properties, and microbial and soil chemical diversity on the formation of particulate  
814 and mineral-associated organic matter, *Soil Biol. Biochem.*, 168, 108648,  
815 <https://doi.org/10.1016/j.soilbio.2022.108648>, 2022.
- 816 Cotrufo, M. F., Ranalli, M. G., Haddix, M. L., Six, J., and Lugato, E.: Soil carbon storage informed by  
817 particulate and mineral-associated organic matter, *Nature Geoscience*, 12(12), 989-994,  
818 <https://doi.org/10.1038/s41561-019-0484-6>, 2019.
- 819 Cotrufo, M. F., Wallenstein, M. D., Boot, C. M., Deneff, K., and Paul, E.: The Microbial Efficiency-  
820 Matrix Stabilization (MEMS) framework integrates plant litter decomposition with soil organic  
821 matter stabilization: do labile plant inputs form stable soil organic matter?, *Glob. Change Biol.*,  
822 19(4), 988-995, <https://doi.org/10.1111/gcb.12113>, 2013.
- 823 Craney, T. A., and Surles, J. G.: Model-Dependent Variance Inflation Factor Cutoff Values, *Quality*  
824 *Engineering*, 14(3), 391-403, <https://doi.org/10.1081/qen-120001878>, 2002.



- 825 Cremer, M., and Prietzel, J.: Soil acidity and exchangeable base cation stocks under pure and mixed  
826 stands of European beech, Douglas fir and Norway spruce, *Plant Soil*, 415(1-2), 393-405,  
827 <https://doi.org/10.1007/s11104-017-3177-1>, 2017.
- 828 Culman, S. W., Snapp, S. S., Freeman, M. A., Schipanski, M. E., Beniston, J., Lal, R., Drinkwater, L.  
829 E., Franzluebbers, A. J., Glover, J. D., Grandy, A. S., Lee, J., Six, J., Maul, J. E., Mirksy, S. B.,  
830 Spargo, J. T., and Wander, M. M.: Permanganate Oxidizable Carbon Reflects a Processed Soil  
831 Fraction that is Sensitive to Management, *Soil Sci. Soc. Am. J.*, 76(2), 494-504,  
832 <https://doi.org/10.2136/sssaj2011.0286>, 2012.
- 833 Curto, J. D., and Pinto, J. C.: The corrected VIF (CVIF), *Journal of Applied Statistics*, 38(7), 1499-  
834 1507, <https://doi.org/10.1080/02664763.2010.505956>, 2011.
- 835 da Silva, H. F., de Sousa, P. V. F., Escobar, M. E. O., and de Oliveira, T. S. (2025). Changes in the  
836 composition of soil organic matter caused by organic and conventional management in the long  
837 term. *Journal of Environmental Management*, 374, 124018, 2025.
- 838 Davidson, E. A., and Janssens, I. A.: Temperature sensitivity of soil carbon decomposition and  
839 feedbacks to climate change, *Nature*, 440(7081), 165-173, <https://doi.org/10.1038/nature04514>,  
840 2006.
- 841 Delahaie, A. A., Barré, P., Baudin, F., Arrouays, D., Bispo, A., Boulonne, L., Chenu, C., Jolivet, C.,  
842 Martin, M. P., Ratić, C., Saby, N. P. A., Savignac, F., and Cécillon, L.: Elemental  
843 stoichiometry and Rock-Eval® thermal stability of organic matter in French topsoils, *SOIL*,  
844 9(1), 209-229, <https://doi.org/10.5194/soil-9-209-2023>, 2023.
- 845 De Neve, S. and Hofman, G.: Influence of soil compaction on carbon and nitrogen mineralization of  
846 soil organic matter and crop residues, *Biol. Fertil. Soils*, 30, 544–549,  
847 <https://doi.org/10.1007/s003740050034>, 2000.
- 848 Dexter, A.R.: Soil physical quality: Part I. Theory, effects of soil texture, density, and organic matter,  
849 and effects on root growth. *Geoderma*, 120(3-4), pp.201-214, 2004
- 850 Disnar, J., Guillet, B., Keravis, D., Di-Giovanni, C., and Sebag, D.: Soil organic matter (SOM)  
851 characterization by Rock-Eval pyrolysis: scope and limitations, *Org. Geochem.*, 34(3), 327-  
852 343, [https://doi.org/10.1016/s0146-6380\(02\)00239-5](https://doi.org/10.1016/s0146-6380(02)00239-5), 2003.
- 853 Doležalová-Weissmannová, H., Malý, S., Brtnický, M., Holátko, J., Demyan, M. S., Siewert, C.,  
854 Tokarski, D., Kameníková, E., and Kučerík, J.: Practical applications of thermogravimetry in  
855 soil science: Part 5. Linking the microbial soil characteristics of grassland and arable soils to  
856 thermogravimetry data, *J. Therm. Anal. Calorim.*, 148, 1599–1611,  
857 <https://doi.org/10.1007/s10973-022-11709-6>, 2023.
- 858 Dungait, J. A. J., Hopkins, D. W., Gregory, A. S., and Whitmore, A. P.: Soil organic matter turnover is  
859 governed by accessibility not recalcitrance, *Glob. Change Biol.*, 18, 1781–1796,  
860 <https://doi.org/10.1111/j.1365-2486.2012.02665.x>, 2012.
- 861 Entio, L. J., Taggart, C. B., Muir, J. P., Kan, E., Brady, J. A., and Obayomi, O.: Biochar and Dairy  
862 Manure Amendment Effects on *Cynodon dactylon* Performance and Soil Properties, *Plants*,  
863 13(2), 242, <https://doi.org/10.3390/plants13020242>, 2024.

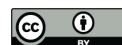

- 864 Epskamp, S., Cramer, A. O. J., Waldorp, L. J., Schmittmann, V. D., and Borsboom, D.: qgraph:  
865 Network visualizations of relationships in psychometric data, *J. Stat. Softw.*, 48, 1–18,  
866 <https://doi.org/10.18637/jss.v048.i04>, 2012.
- 867 Fahmy, S. H., Rees, H. W., Wang, C., and Walker, J. A.: Soil survey reports of New Brunswick,  
868 Agriculture and Agri-Food Canada, Fredericton, New Brunswick, 2010.
- 869 Fang, K., Chen, L., Qin, S., Zhang, Q., Liu, X., Chen, P., and Yang, Y.: Mineral and Climatic Controls  
870 Over Soil Organic Matter Stability Across the Tibetan Alpine Permafrost Region, *Global*  
871 *Biogeochemical Cycles*, 35(12), e2021GB007118, <https://doi.org/10.1029/2021gb007118>,  
872 2021.
- 873 Fernández, J. M., Peltre, C., Craine, J. M., and Plante, A. F.: Improved Characterization of Soil  
874 Organic Matter by Thermal Analysis Using CO<sub>2</sub>/H<sub>2</sub>O Evolved Gas  
875 Analysis, *Environmental Science & Technology*, 46(16), 8921-8927,  
876 <https://doi.org/10.1021/es301375d>, 2012.
- 877 Fernández, J. M., Plante, A. F., Leifeld, J., and Rasmussen, C.: Methodological considerations for  
878 using thermal analysis in the characterization of soil organic matter, *J. Therm. Anal. Calorim.*,  
879 104(1), 389-398, <https://doi.org/10.1007/s10973-010-1145-6>, 2011.
- 880 Furze, S. and Arp, P.: Amalgamation and harmonization of soil survey reports into a multi-purpose  
881 database. *Canadian Journal of Soil Science*, 101(2), pp.222-247, 2020
- 882 Furze, S., O’Sullivan, A.M., Allard, S., Pronk, T. and Curry, R.A., 2021. A high-resolution, random  
883 forest approach to mapping depth-to-bedrock across shallow overburden and post-glacial  
884 terrain. *Remote Sensing*, 13(21), p.4210, 2021
- 885 Friedman, J. H.: Greedy function approximation: A gradient boosting machine, *The Annals of*  
886 *Statistics*, 29(5), <https://doi.org/10.1214/aos/1013203451>, 2001.
- 887 Gao, W., Zhou, T., and Ren, T.: Conversion from Conventional to No Tillage Alters Thermal Stability  
888 of Organic Matter in Soil Aggregates, *Soil Sci. Soc. Am. J.*, 79(2), 585-594,  
889 <https://doi.org/10.2136/sssaj2014.08.0334>, 2015.
- 890 Giannetta, B., Plaza, C., Vischetti, C., Cotrufo, M. F., and Zaccaro, C.: Distribution and thermal  
891 stability of physically and chemically protected organic matter fractions in soils across different  
892 ecosystems, *Biology and Fertility of Soils*, 54(5), 671-681, [https://doi.org/10.1007/s00374-018-](https://doi.org/10.1007/s00374-018-1290-9)  
893 1290-9, 2018.
- 894 Gillespie, A., Sanei, H., Diochon, A., Ellert, B., Regier, T., Chevrier, D., Dynes, J., Tarnocai, C., and  
895 Gregorich, E.: Perennially and annually frozen soil carbon differ in their susceptibility to  
896 decomposition: Analysis of Subarctic earth hummocks by bioassay, XANES and pyrolysis, *Soil*  
897 *Biol. Biochem.*, 68, 106-116, <https://doi.org/10.1016/j.soilbio.2013.09.021>, 2014.
- 898 Goñi, F. M., and Alonso, A.: Differential Scanning Calorimetry in the Study of Lipid Structures,  
899 *Chemical Biology*, 47-66, <https://doi.org/10.1002/9780470319253.ch4>, 2006.
- 900 Goldstein, A., Kapelner, A., Bleich, J., and Pitkin, E.: Peeking Inside the Black Box: Visualizing  
901 Statistical Learning With Plots of Individual Conditional Expectation, *Journal of*  
902 *Computational and Graphical Statistics*, 24(1), 44-65,  
903 <https://doi.org/10.1080/10618600.2014.907095>, 2015.



- 904 Grace, J. B., Scheiner, S. M., and Schoolmaster, D. R.: Structural equation modeling, in: Ecological  
905 Statistics: Contemporary Theory and Application, edited by: Fox, G. A., Negrete-Yankelevich,  
906 S., and Sosa, V. J., Oxford University Press, Oxford, 168–199,  
907 <https://doi.org/10.1093/acprof:oso/9780199672547.003.0009>, 2015.
- 908 Gregorich, E., Gillespie, A., Beare, M., Curtin, D., Sanei, H., and Yanni, S.: Evaluating  
909 biodegradability of soil organic matter by its thermal stability and chemical composition, *Soil*  
910 *Biol. Biochem.*, 91, 182–191, <https://doi.org/10.1016/j.soilbio.2015.08.032>, 2015.
- 911 Hall, S. J., and Silver, W. L.: Reducing conditions, reactive metals, and their interactions can explain  
912 spatial patterns of surface soil carbon in a humid tropical forest, *Biogeochemistry*, 125(2), 149–  
913 165, <https://doi.org/10.1007/s10533-015-0120-5>, 2015.
- 914 Hall, S. J., Silver, W. L., Timokhin, V. I., and Hammel, K. E.: Iron addition to soil specifically  
915 stabilized lignin, *Soil Biol. Biochem.*, 98, 95–98, <https://doi.org/10.1016/j.soilbio.2016.04.010>,  
916 2016.
- 917 Haynes, R.: Labile Organic Matter Fractions as Central Components of the Quality of Agricultural  
918 Soils: An Overview, *Advances in Agronomy*, 221–268, [https://doi.org/10.1016/s0065-](https://doi.org/10.1016/s0065-2113(04)85005-3)  
919 [2113\(04\)85005-3](https://doi.org/10.1016/s0065-2113(04)85005-3), 2005.
- 920 Hill, A. B.: The environment and disease: association or causation?, *Proc. R. Soc. Med.*, 58, 295–300,  
921 1965.
- 922 Hu, L. and Bentler, P. M.: Cutoff criteria for fit indexes in covariance structure analysis: conventional  
923 criteria versus new alternatives, *Struct. Equ. Modeling*, 6, 1–55,  
924 <https://doi.org/10.1080/10705519909540118>, 1999.
- 925 IUSS Working Group WRB: World Reference Base for Soil Resources 2006, first update 2007, *World*  
926 *Soil Resources Reports*, 103, FAO, Rome, 2007.
- 927 Kasraei, B., Schmidt, M. G., Zhang, J., Bulmer, C. E., Filatow, D. S., Arbor, A., Pennell, T., and  
928 Heung, B.: A framework for optimizing environmental covariates to support model  
929 interpretability in digital soil mapping, *Geoderma*, 445, 116873,  
930 <https://doi.org/10.1016/j.geoderma.2024.116873>, 2024.
- 931 Kögel-Knabner, I.: The macromolecular organic composition of plant and microbial residues as inputs  
932 to soil organic matter, *Soil Biol. Biochem.*, 34(2), 139–162, [https://doi.org/10.1016/s0038-](https://doi.org/10.1016/s0038-0717(01)00158-4)  
933 [0717\(01\)00158-4](https://doi.org/10.1016/s0038-0717(01)00158-4), 2002.
- 934 King, A. E., Amsili, J. P., Córdova, S. C., Culman, S., Fonte, S. J., Kotcon, J., Masters, M. D., McVay,  
935 K., Olk, D. C., Prairie, A. M., Schipanski, M., Schneider, S. K., Stewart, C. E., and Cotrufo, M.  
936 F.: Constraints on mineral-associated and particulate organic carbon response to regenerative  
937 management: carbon inputs and saturation deficit, *Soil and Tillage Research*, 238, 106008,  
938 <https://doi.org/10.1016/j.still.2024.106008>, 2024.
- 939 Kirkby, C. A., Richardson, A. E., Wade, L. J., Batten, G. D., Blanchard, C., and Kirkegaard, J. A.:  
940 Carbon-nutrient stoichiometry to increase soil carbon sequestration, *Soil Biol. Biochem.*, 60,  
941 77–86, <https://doi.org/10.1016/j.soilbio.2013.01.011>, 2013.



- 942 Kleber, M., Sollins, P., and Sutton, R.: A conceptual model of organo-mineral interactions in soils:  
943 self-assembly of organic molecular fragments into zonal structures on mineral surfaces,  
944 *Biogeochemistry*, 85, 9–24, <https://doi.org/10.1007/s10533-007-9103-5>, 2007.
- 945 Kučerík, J., Tokarski, D., Demyan, M. S., Merbach, I., and Siewert, C.: Linking soil organic matter  
946 thermal stability with contents of clay, bound water, organic carbon and nitrogen, *Geoderma*,  
947 316, 38-46, <https://doi.org/10.1016/j.geoderma.2017.12.001>, 2018.
- 948 Kučerík, J., Čtvrtníčková, A., and Siewert, C.: Practical application of thermogravimetry in soil  
949 science, *J. Therm. Anal. Calorim.*, 113(3), 1103-1111, <https://doi.org/10.1007/s10973-012-2849-6>, 2013.
- 950
- 951 Kuhn, M.: caret: Classification and Regression Training, CRAN: Contributed Packages,  
952 <https://doi.org/10.32614/cran.package.caret>, 2007.
- 953 Lal, R.: Soil Carbon Sequestration Impacts on Global Climate Change and Food Security, *Science*,  
954 304(5677), 1623-1627, <https://doi.org/10.1126/science.1097396>, 2004.
- 955 Laurence, L., Heung, B., Strom, H., Stiles, K., and Burton, D.: Towards a cost-effective framework for  
956 estimating soil nitrogen pools using pedotransfer functions and machine learning, *Geoderma*,  
957 440, 116692, <https://doi.org/10.1016/j.geoderma.2023.116692>, 2023.
- 958 Laurence, L., Heung, B., Zhang, J., Pennell, T., Nyiraneza, J., Strom, H., Stiles, K., and Burton, D. L.:  
959 Integrating multi-year crop inventories as a proxy for soil management within a digital soil  
960 mapping framework for predicting nitrogen indices, *Geoderma*, 448, 116944,  
961 <https://doi.org/10.1016/j.geoderma.2024.116944>, 2024.
- 962 Lehmann, J., and Kleber, M.: The contentious nature of soil organic matter, *Nature*, 528(7580), 60-68,  
963 <https://doi.org/10.1038/nature16069>, 2015.
- 964 Leifeld, J., Siebert, S., and Kögel-Knabner, I.: Changes in the chemical composition of soil organic  
965 matter after application of compost, *Eur. J. Soil Sci.*, 53(2), 299-309,  
966 <https://doi.org/10.1046/j.1351-0754.2002.00453.x>, 2002.
- 967 Li, F., Gui, X., Ji, W., and Zhou, C.: Effect of calcium dihydrogen phosphate addition on carbon  
968 retention and stability of biochars derived from cellulose, hemicellulose, and lignin,  
969 *Chemosphere*, 251, 126335, <https://doi.org/10.1016/j.chemosphere.2020.126335>, 2020.
- 970 Liu, M., Qiao, N., Xu, X., Fang, H., Wang, H., and Kuzyakov, Y.: C:N stoichiometry of stable and  
971 labile organic compounds determine priming patterns, *Geoderma*, 362, 114122,  
972 <https://doi.org/10.1016/j.geoderma.2019.114122>, 2020.
- 973 Li, Z., Xiao, L., Deng, C., Yuan, Z., Liang, C., Xiong, Q., Li, Z., and Nie, X.: Thermal stability of soil  
974 organic carbon subjected to water erosion as a function of edaphic factors, *Int. J. Sediment  
975 Res.*, 37(1), 26-36, <https://doi.org/10.1016/j.ijsrc.2021.06.002>, 2022.
- 976 Lorenz, M., Maskow, T., and Thiele-Bruhn, S.: Energy stored in soil organic matter is influenced by  
977 litter quality and the degree of transformation – A combustion calorimetry study, *Geoderma*,  
978 443, 116846, <https://doi.org/10.1016/j.geoderma.2024.116846>, 2024.
- 979 Ma, D., He, Z., Zhao, W., Li, R., Sun, W., Wang, W., Lin, P., Wei, L., and Ju, W.: Long-term effects  
980 of conventional cultivation on soil cation exchange capacity and base saturation in an arid



- 981 desert region, *Sci. Total Environ.*, 949, 175075,  
982 <https://doi.org/10.1016/j.scitotenv.2024.175075>, 2024.
- 983 Mayer, M., Leifeld, J., Szidat, S., Mäder, P., Krause, H. M., and Steffens, M.: Dynamic stability of  
984 mineral-associated organic matter: enhanced stability and turnover through organic fertilization  
985 in a temperate agricultural topsoil, *Soil Biol. Biochem.*, 184, 109095,  
986 <https://doi.org/10.1016/j.soilbio.2023.109095>, 2023.
- 987 McElhaney, R. N.: The use of differential scanning calorimetry and differential thermal analysis in  
988 studies of model and biological membranes, *Chemistry and Physics of Lipids*, 30(2-3), 229-  
989 259, [https://doi.org/10.1016/0009-3084\(82\)90053-6](https://doi.org/10.1016/0009-3084(82)90053-6), 1982.
- 990 Mesgar, M., Voroney, R. P., Lo, A., Ardakani, O. H., and Gillespie, A. W.: Chemical composition and  
991 thermal stability of topsoil organic carbon: Influence of cropping system and tillage practices,  
992 *Eur. J. Soil Sci.*, 75(1), e13459, <https://doi.org/10.1111/ejss.13459>, 2024.
- 993 Minasny, B., and Mcbratney, A. B.: The Neuro-m Method for Fitting Neural Network Parametric  
994 Pedotransfer Functions, *Soil Sci. Soc. Am. J.*, 66(4), <https://doi.org/10.2136/sssaj2002.1407a>,  
995 2002.
- 996 Mitchell, E., Scheer, C., Rowlings, D., Cotrufo, M. F., Conant, R. T., Friedl, J., and Grace, P.: Trade-  
997 off between ‘new’ SOC stabilisation from above-ground inputs and priming of native C as  
998 determined by soil type and residue placement, *Biogeochemistry*, 149(2), 221-236,  
999 <https://doi.org/10.1007/s10533-020-00675-6>, 2020.
- 1000 Moore, P., Lukenbach, M., Kettridge, N., Petrone, R., Devito, K., and Waddington, J.: Peatland water  
1001 repellency: Importance of soil water content, moss species, and burn severity, *Journal of*  
1002 *Hydrology*, 554, 656-665, <https://doi.org/10.1016/j.jhydrol.2017.09.036>, 2017.
- 1003 Murphy, B. W.: *Soil Organic Matter and Soil Function – Review of the Literature and Underlying*  
1004 *Data*, Department of the Environment, Canberra, Australia, 2014.
- 1005 Nie, X., Yuan, Z., Huang, B., Liao, Y., Zhang, X., Li, Z., and Li, D.: Effects of water erosion on soil  
1006 organic carbon stability in the subtropical China, *Journal of Soils and Sediments*, 19(10), 3564-  
1007 3575, <https://doi.org/10.1007/s11368-019-02305-7>, 2019.
- 1008 Padarian, J., Minasny, B., and McBratney, A. B.: Machine learning and soil sciences: a review aided  
1009 by machine learning tools, *SOIL*, 6(1), 35-52, <https://doi.org/10.5194/soil-6-35-2020>, 2020.
- 1010 Paul, E. A., Morris, S. J., Conant, R. T., and Plante, A. F.: Does the Acid Hydrolysis–Incubation  
1011 Method Measure Meaningful Soil Organic Carbon Pools?, *Soil Sci. Soc. Am. J.*, 70(3), 1023-  
1012 1035, <https://doi.org/10.2136/sssaj2005.0103>, 2006.
- 1013 Paul, S. S., Heung, B., and Lynch, D. H.: Modeling of total and active organic carbon dynamics in  
1014 agricultural soil using digital soil mapping: a case study from Central Nova Scotia, *Canadian*  
1015 *Journal of Soil Science*, 103(1), 64-80, <https://doi.org/10.1139/cjss-2022-0012>, 2023.
- 1016 Peltre, C., Fernández, J. M., Craine, J. M., and Plante, A. F.: Relationships between Biological and  
1017 Thermal Indices of Soil Organic Matter Stability Differ with Soil Organic Carbon Level, *Soil*  
1018 *Sci. Soc. Am. J.*, 77(6), 2020-2028, <https://doi.org/10.2136/sssaj2013.02.0081>, 2013.
- 1019 Plante, A. F., Fernández, J. M., and Leifeld, J.: Application of thermal analysis techniques in soil  
1020 science, *Geoderma*, 153(1-2), 1-10, <https://doi.org/10.1016/j.geoderma.2009.08.016>, 2009.

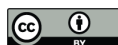

- 1021 Plante, A. F., Fernández, J. M., Haddix, M. L., Steinweg, J. M., and Conant, R. T.: Biological,  
1022 chemical and thermal indices of soil organic matter stability in four grassland soils, *Soil Biol.*  
1023 *Biochem.*, 43(5), 1051-1058, <https://doi.org/10.1016/j.soilbio.2011.01.024>, 2011.
- 1024 Preacher, K. J. and Hayes, A. F.: Asymptotic and resampling strategies for assessing and comparing  
1025 indirect effects in multiple mediator models, *Behav. Res. Methods*, 40, 879–891,  
1026 <https://doi.org/10.3758/BRM.40.3.879>, 2008.
- 1027 Pronk, A. G. and Ruitenbergh, A. A.: Bedrock geology of New Brunswick, New Brunswick Department  
1028 of Natural Resources and Energy, Minerals and Energy Division, Map NR-1, scale 1:500000,  
1029 1991.
- 1030 Rakhsh, F., Golchin, A., Beheshti Al Agha, A., and Alamdari, P.: Effects of exchangeable cations,  
1031 mineralogy and clay content on the mineralization of plant residue carbon, *Geoderma*, 307,  
1032 150-158, <https://doi.org/10.1016/j.geoderma.2017.07.010>, 2017.
- 1033 Rampton, V. N.: Generalized surficial geology map of New Brunswick, Geological Survey of Canada,  
1034 Map 1594A, scale 1:500000, 1984.
- 1035 Rasmussen, C., Heckman, K., Wieder, W. R., Keiluweit, M., Lawrence, C. R., Berhe, A. A.,  
1036 Blankinship, J. C., Crow, S. E., Druhan, J. L., Hicks Pries, C. E., Marin-Spiotta, E., Plante, A.  
1037 F., Schädel, C., Schimel, J. P., Sierra, C. A., Thompson, A., and Wagai, R.: Beyond clay:  
1038 towards an improved set of variables for predicting soil organic matter content,  
1039 *Biogeochemistry*, 137, 297–306, <https://doi.org/10.1007/s10533-018-0424-3>, 2018.
- 1040 Risoluti, R., Gullifa, G., Barone, L., Papa, E., and Materazzi, S.: On-Line Thermally Induced Evolved  
1041 Gas Analysis: An Update—Part 1: EGA-MS, *Molecules*, 27(11), 3518,  
1042 <https://doi.org/10.3390/molecules27113518>, 2022.
- 1043 Rombolà, A. G., Fabbri, D., Meredith, W., Snape, C. E., and Dieguez-Alonso, A.: Molecular  
1044 characterization of the thermally labile fraction of biochar by hydropyrolysis and pyrolysis-  
1045 GC/MS, *J. Anal. Appl. Pyrol.*, 121, 230–239, <https://doi.org/10.1016/j.jaap.2016.08.003>, 2016.
- 1046 Rosseel, Y.: lavaan: An R Package for Structural Equation Modeling, *J. Stat. Softw.*, 48(2),  
1047 <https://doi.org/10.18637/jss.v048.i02>, 2012.
- 1048 Rowley, M. C., Grand, S., and Verrecchia, É. P.: Calcium-mediated stabilisation of soil organic  
1049 carbon, *Biogeochemistry*, 137, 27–49, <https://doi.org/10.1007/s10533-017-0410-1>, 2018.
- 1050 Saurette, D. D.: onsoilsurvey: Making PDSM in Ontario Better, Ontario Ministry of Agriculture, Food  
1051 and Rural Affairs (OMAFRA), Guelph, Ontario, Canada, 2021.
- 1052 Schmidt, M. W. I., Torn, M. S., Abiven, S., Dittmar, T., Guggenberger, G., Janssens, I. A., Kleber, M.,  
1053 Kögel-Knabner, I., Lehmann, J., Manning, D. A. C., Nannipieri, P., Rasse, D. P., Weiner, S.,  
1054 and Trumbore, S. E.: Persistence of soil organic matter as an ecosystem property, *Nature*,  
1055 478(7367), 49-56, <https://doi.org/10.1038/nature10386>, 2011.
- 1056 Sebag, D., Verrecchia, E., Cécillon, L., Adatte, T., Albrecht, R., Aubert, M., Bureau, F., Cailleau, G.,  
1057 Copard, Y., Decaens, T., Disnar, J. R., Hetényi, M., Nyilas, T., and Trombino, L.: Dynamics of  
1058 soil organic matter based on new Rock-Eval indices, *Geoderma*, 284, 185-203,  
1059 <https://doi.org/10.1016/j.geoderma.2016.08.025>, 2016.



- 1060 Shi, D., Lee, T., and Maydeu-Olivares, A.: Understanding the Model Size Effect on SEM Fit Indices,  
1061 Educational and Psychological Measurement, 79(2), 310-334,  
1062 <https://doi.org/10.1177/0013164418783530>, 2019.
- 1063 Shi, J., Lv, J., Peng, Y., Yao, Y., Wei, X., and Wang, X.: Mechanisms controlling the stability and  
1064 sequestration of mineral associated organic carbon upon erosion and deposition, *Catena*, 242,  
1065 108119, <https://doi.org/10.1016/j.catena.2024.108119>, 2024.
- 1066 Shipley, B.: Cause and correlation in biology: a user's guide to path analysis, structural equations and  
1067 causal inference with R, 2nd edn., Cambridge University Press, Cambridge,  
1068 <https://doi.org/10.1017/CBO9781139979573>, 2016.
- 1069 Six, J., and Paustian, K.: Aggregate-associated soil organic matter as an ecosystem property and a  
1070 measurement tool, *Soil Biol. Biochem.*, 68, A4-A9,  
1071 <https://doi.org/10.1016/j.soilbio.2013.06.014>, 2014.
- 1072 Six, J., Bossuyt, H., Degryze, S., and Deneff, K.: A history of research on the link between  
1073 (micro)aggregates, soil biota, and soil organic matter dynamics, *Soil and Tillage Research*,  
1074 79(1), 7-31, <https://doi.org/10.1016/j.still.2004.03.008>, 2004.
- 1075 Six, J., Conant, R. T., Paul, E. A., and Paustian, K.: Stabilization mechanisms of soil organic matter:  
1076 Implications for C-saturation of soils, *Plant Soil*, 241(2), 155-176,  
1077 <https://doi.org/10.1023/a:1016125726789>, 2002.
- 1078 Solomon, D., Lehmann, J., Harden, J., Wang, J., Kinyangi, J., Heymann, K., Karunakaran, C., Lu, Y.,  
1079 Wirrick, S., and Jacobsen, C.: Micro- and nano-environments of carbon sequestration: Multi-  
1080 element STXM–NEXAFS spectromicroscopy assessment of microbial carbon and mineral  
1081 associations, *Chem. Geol.*, 329, 53-73, <https://doi.org/10.1016/j.chemgeo.2012.02.002>, 2012.
- 1082 Sparks, D. L.: Chemistry of soil organic matter, *Environmental Soil Chemistry*, 53-80,  
1083 <https://doi.org/10.1016/b978-0-12-656445-7.50007-3>, 1995.
- 1084 Smith, P., Cotrufo, M. F., Rumpel, C., Paustian, K., Kuikman, P. J., Elliott, J. A., McDowell, R.,  
1085 Griffiths, R. I., Asakawa, S., Bustamante, M., House, J. I., Sobocká, J., Harper, R., Pan, G.,  
1086 West, P. C., Gerber, J. S., Clark, J. M., Adhya, T., Scholes, R. J., and Scholes, M. C.:  
1087 Biogeochemical cycles and biodiversity as key drivers of ecosystem services provided by soils,  
1088 *SOIL*, 1, 665–685, <https://doi.org/10.5194/soil-1-665-2015>, 2015.
- 1089 Tao, F., Huang, Y., Hungate, B. A., Manzoni, S., Frey, S. D., Schmidt, M. W. I., Reichstein, M.,  
1090 Carvalhais, N., Ciais, P., Jiang, L., Lehmann, J., Wang, Y. P., Houlton, B. Z., Ahrens, B.,  
1091 Mishra, U., Hugelius, G., Hocking, T. D., Lu, X., Shi, Z., Viatkin, K., Vargas, R., Yigini, Y.,  
1092 Omuto, C., Malik, A. A., Peralta, G., Cuevas-Corona, R., Di Paolo, L. E., Luotto, I., Liao, C.,  
1093 Liang, Y. S., Saynes, V. S., Huang, X., and Luo, Y.: Microbial carbon use efficiency promotes  
1094 global soil carbon storage, *Nature*, 618(7967), 981-985, <https://doi.org/10.1038/s41586-023-06042-3>, 2023.
- 1096 Thompson, C. G., Kim, R. S., Aloe, A. M., and Becker, B. J.: Extracting the Variance Inflation Factor  
1097 and Other Multicollinearity Diagnostics from Typical Regression Results, *Basic and Applied  
1098 Social Psychology*, 39(2), 81-90, <https://doi.org/10.1080/01973533.2016.1277529>, 2017.



- 1099 Tisdale, S. L., and Nelson, W. L.: Soil Fertility and Fertilizers, *Soil Science*, 101(4), 346,  
1100 <https://doi.org/10.1097/00010694-196604000-00016>, 1966.
- 1101 Vallotton, J. D., Comeau, L. P., Goyer, C., Wagg, C., and Unc, A.: Land use is reliably predicted by  
1102 soil burst respiration profiles, *Appl. Soil Ecol.*, 214, 106315, [doi.org](https://doi.org/10.1016/j.apsoil.2025.106315), 2025.
- 1103 Van Looy, K., Bouma, J., Herbst, M., Koestel, J., Minasy, B., Mishra, U., Montzka, C., Nemes, A.,  
1104 Pachepsky, Y. A., Padarian, J., Schaap, M. G., Tóth, B., Verhoef, A., Vanderborght, J., van der  
1105 Ploeg, M. J., Weihermüller, L., Zacharias, S., Zhang, Y., and Vereecken, H.: Pedotransfer  
1106 Functions in Earth System Science: Challenges and Perspectives, *Reviews of Geophysics*,  
1107 55(4), 1199-1256, <https://doi.org/10.1002/2017rg000581>, 2017.
- 1108 Verchovsky, A., Anand, M., Barber, S., Sheridan, S., and Morgan, G.: A quantitative evolved gas  
1109 analysis for extra-terrestrial samples, *Planetary and Space Science*, 181, 104830,  
1110 <https://doi.org/10.1016/j.pss.2019.104830>, 2020.
- 1111 Wade, J., Potter, T. S., and Margenot, A. J.: Commentary: Structural equation models and causal  
1112 claims in soil science and biogeochemistry – An equation-free “how to”, *Geoderma*, 466,  
1113 117702, <https://doi.org/10.1016/j.geoderma.2026.117702>, 2026.
- 1114 Wadoux, A. M. C., and Molnar, C.: Beyond prediction: methods for interpreting complex models of  
1115 soil variation, *Geoderma*, 422, 115953, <https://doi.org/10.1016/j.geoderma.2022.115953>, 2022.
- 1116 Wagai, R., and Mayer, L. M.: Sorptive stabilization of organic matter in soils by hydrous iron oxides,  
1117 *Geochimica et Cosmochimica Acta*, 71(1), 25-35, <https://doi.org/10.1016/j.gca.2006.08.047>,  
1118 2007.
- 1119 Wenyika, P., Enesi, R. O., Gorim, L. Y., and Dyck, M.: Effects of liming on soil biota and related  
1120 processes in agroecosystems: a review, *Discover Soil*, 2(1), 37, [https://doi.org/10.1007/s44378-](https://doi.org/10.1007/s44378-025-00063-2)  
1121 025-00063-2, 2025.
- 1122 Wiesmeier, M., Urbanski, L., Hobbey, E., Lang, B., von Lützw, M., Marin-Spiotta, E., van Wesemael,  
1123 B., Rabot, E., Ließ, M., Garcia-Franco, N., Wollschläger, U., Vogel, H. J., and Kögel-Knabner,  
1124 I.: Soil organic carbon storage as a key function of soils - A review of drivers and indicators at  
1125 various scales, *Geoderma*, 333, 149-162, <https://doi.org/10.1016/j.geoderma.2018.07.026>,  
1126 2019.
- 1127 Wu, G., Gao, J., Li, H., Ren, F., Liang, D., and Li, X.: Shifts in plant and soil C, N, and P  
1128 concentrations and C:N:P stoichiometry associated with environmental factors in alpine marshy  
1129 wetlands in West China, *Catena*, 221, 106801, <https://doi.org/10.1016/j.catena.2022.106801>,  
1130 2023.
- 1131 Yu, G. H., Chen, C. M., He, X. H., Zhang, X. Z., and Li, L. N.: Unexpected bulk density and  
1132 microstructures response to long-term pig manure application in a Ferralic Cambisol Soil:  
1133 Implications for rebuilding a healthy soil, *Soil and Tillage Research*, 203, 104668,  
1134 <https://doi.org/10.1016/j.still.2020.104668>, 2020.
- 1135 Zhang, X., Li, Z., Nie, X., Huang, M., Wang, D., Xiao, H., Liu, C., Peng, H., Jiang, J., and Zeng, G.:  
1136 The role of dissolved organic matter in soil organic carbon stability under water erosion,  
1137 *Ecological Indicators*, 102, 724-733, <https://doi.org/10.1016/j.ecolind.2019.03.038>, 2019.
- 1138

<https://doi.org/10.5194/egusphere-2026-2849>

Preprint. Discussion started: 12 June 2026

© Author(s) 2026. CC BY 4.0 License.

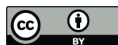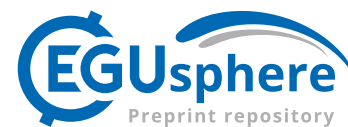

1139

1140

1141

1142

1143

1144

1145

1146

1147

1148

1149
